# Supplementary material for: Crystal structure and functional characterization of an oligosaccharide dehydrogenase from Pycnoporus cinnabarinus provides insights into fungal breakdown of lignocellulose
Source: PubMed Central journal article supplement (PMC8296622; doi:10.1186/s13068-021-02003-y), 2021-07-22

## Additional File 1. Supplementary figures

**Figure S1.** Chemical structures of the monosaccharides and gluco-oligosaccharides tested for ODH activity. Carbon atoms involved in glycosidic bonds are numbered. D-galactose and D-mannose are epimers of D-glucose, respectively at C4 and C2. D-xylose differs from D-glucose for the absence of the group CH<sub>2</sub>-OH at C5. D-lactose is a disaccharide composed by D-galactose linked to D-glucose by a β(1→4) glycosidic bond and D-maltose is a disaccharide made by two units of glucose joined with an α(1→4) bond.

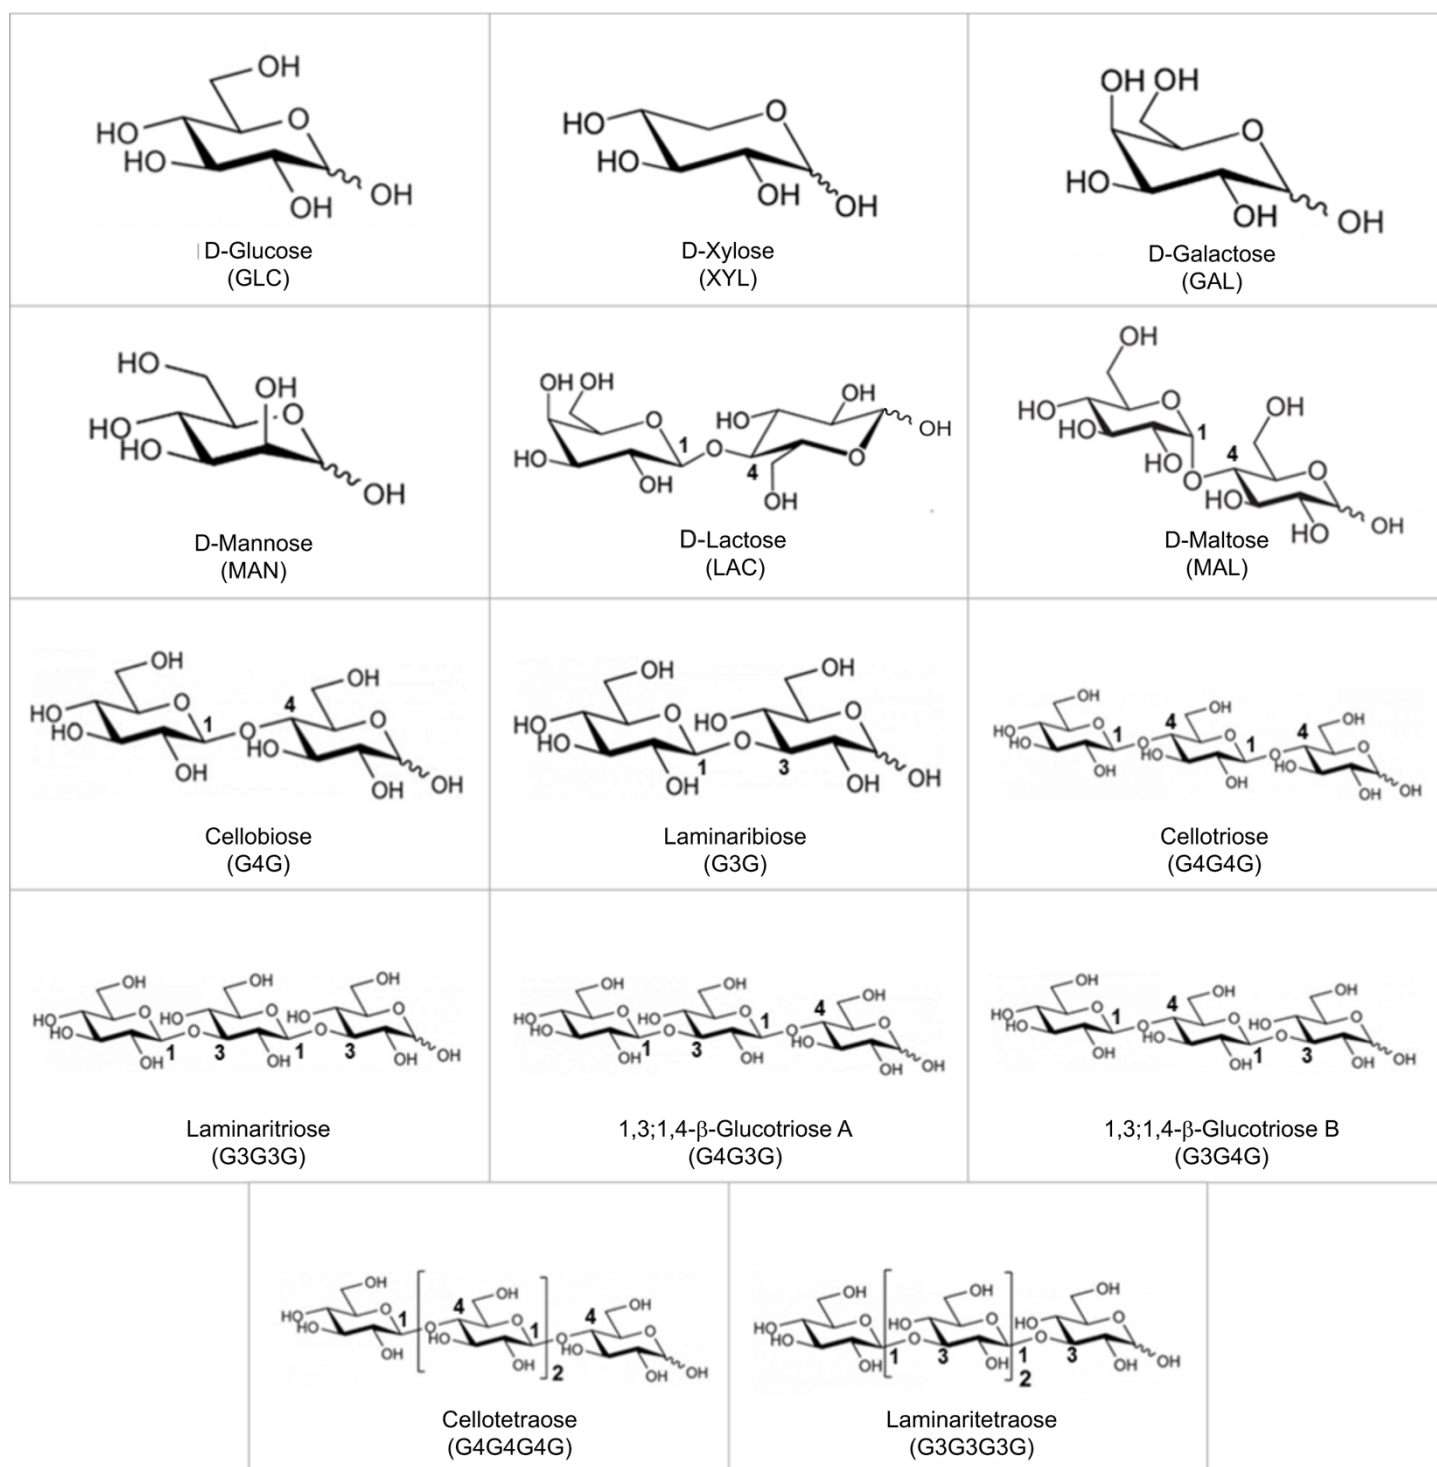

**Figure S2.** Extended ODH substrate screening. To evaluate ODH activity towards all glucobiose isomers with a reducing end, substrate screening was further extended to sophorose, gentiobiose, nigerose, kojibiose and isomaltose, whose structures are represented within the squared boxes. The experiment was conducted as described for obtaining the data reported in Fig. 2 of the main text. Enzyme activity, comparable to the one observed on GLC, was only detected for gentiobiose. To exclude any possible artifacts, we verified by LC/MS that gentiobiose was not hydrolyzed (data not shown).

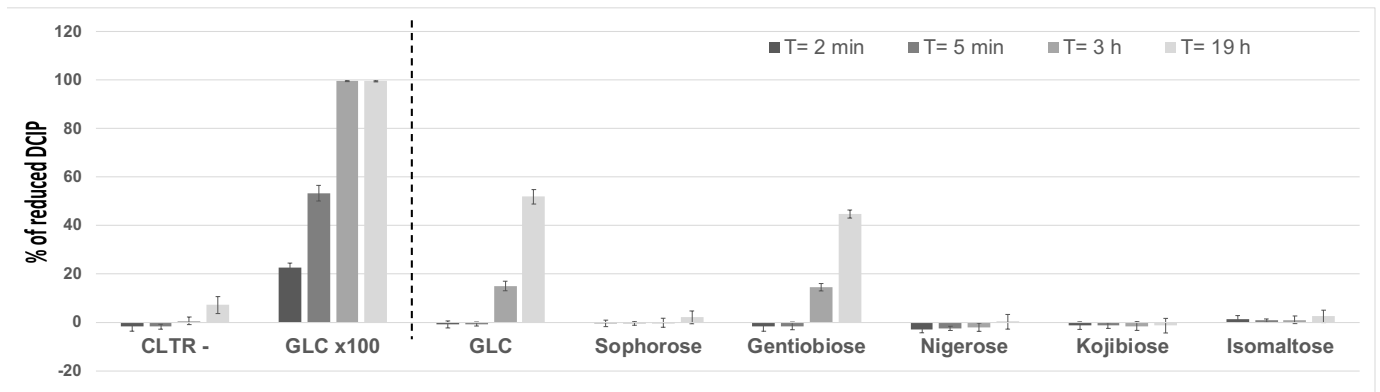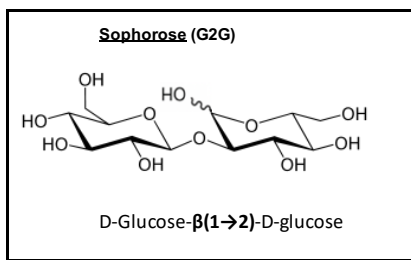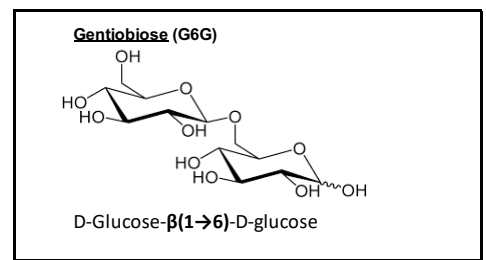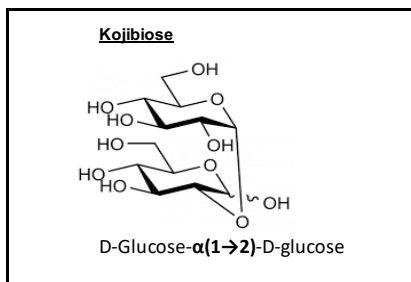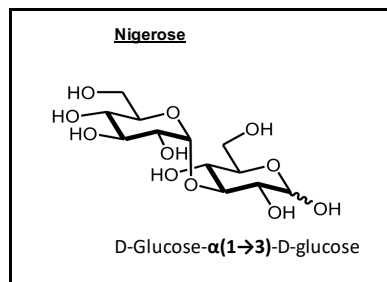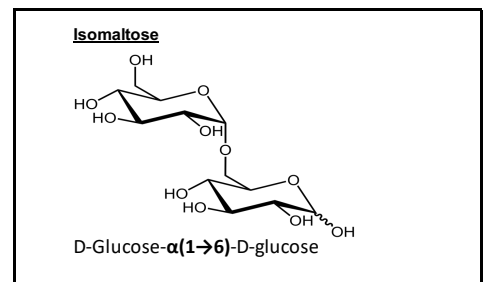

**Figure S3.** LC-MS analysis of enzymatic products. Top panel: chromatographic separation of G3G (grey) and of an overnight G3G/DCIP/ODH reaction (black). G3G (MW=342 g/mol) appeared as a double chromatographic peak (peak 1) corresponding to the  $\alpha$ - and  $\beta$ -anomers, as confirmed by the detection of ions having  $m/z$  values of 341 [M-H], 387 [M+Formate -H] and 683 [2M-H] (not shown). After enzyme oxidation only (peak 2), laminaribionic acid (MW=358 g/mol) was detected by ions having  $m/z$  values of 357 [M-H] and 715 [2M-H] (bottom panel), while no formate adduct was detected. DCIP (MW=268 g/mol, oxidized) was also detected at an  $m/z$  value of 266 (and a minor peak at 268 for reduced DCIP). The chemical nature of laminaribionic acid confirms specific enzymatic oxidation of the C1 hydroxyl of G3G reducing end, as oxidation of other G3G hydroxyls would not result into hydrolysable enzyme products. The same enzymatic reaction (not shown) was assessed for GLC (MW=180 g/mol), detected by ions having an  $m/z$  value of 225 [M+Formate -H], and gluconic acid (MW=196 g/mol), detected at an  $m/z$  value of 195 [M-H] in GLC/DCIP/ODH overnight incubations, in agreement with what we previously reported [14].

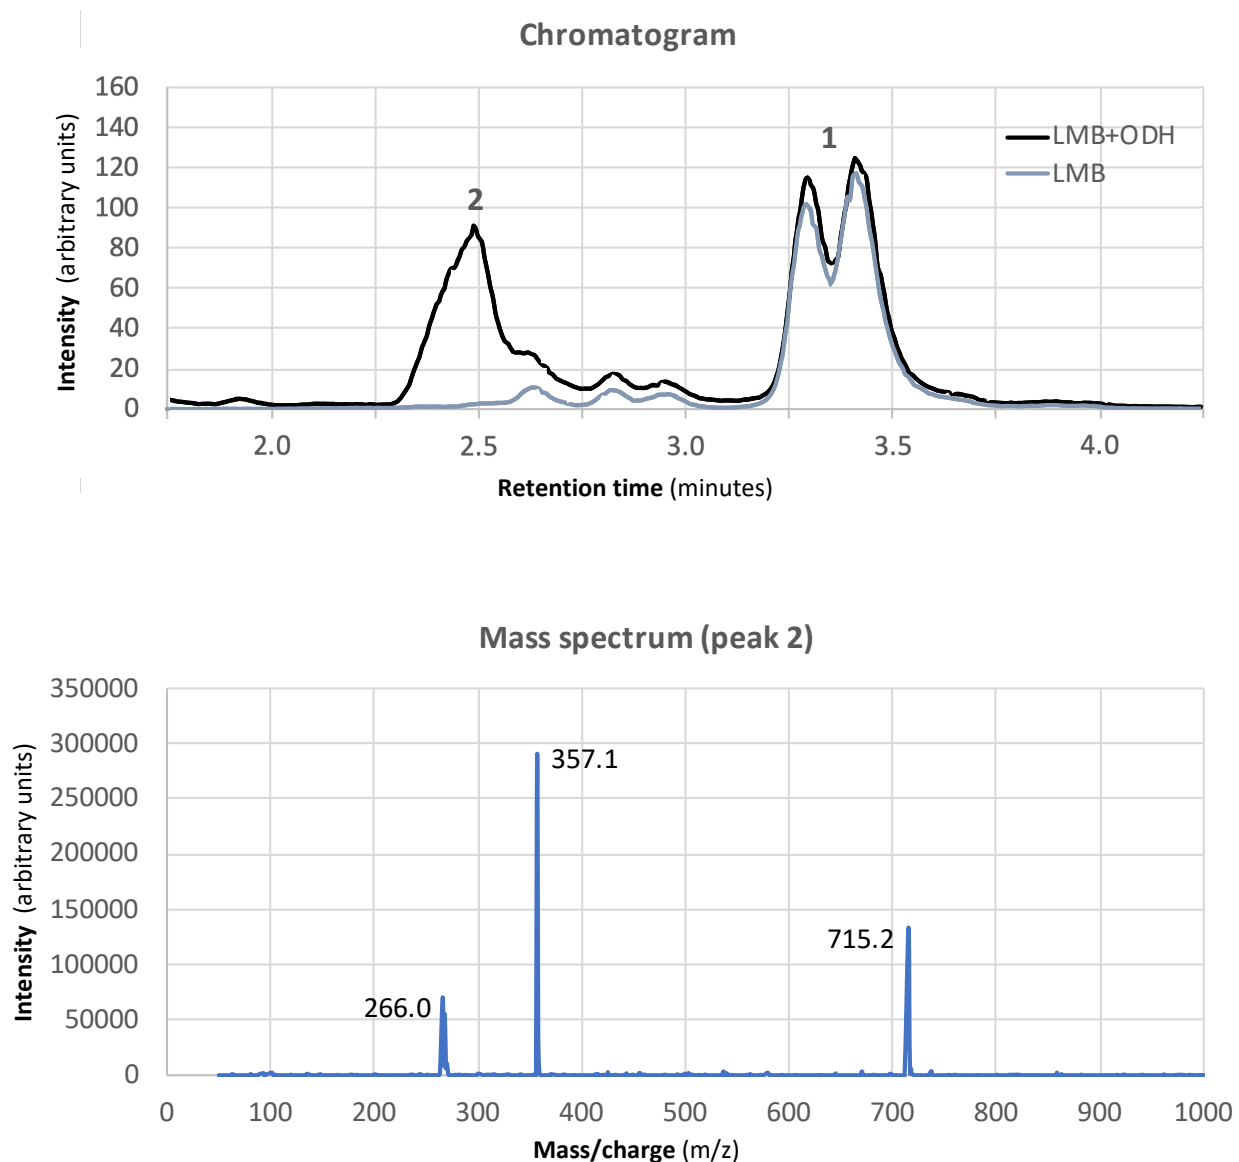

**Figure S4.** Full-range enzymatic kinetics of ODH on GLC. Initial rates of DCIP reduction as a function of GLC concentration, ranging between 0 and 3000 mM. The solid line represents a fit to the equation:  $v_0 = (V'_{max} \times [S]) / (K'_M + [S] + [S]^2 / K_i)$ , which takes substrate inhibition into account. In the equation  $v_0$  is the initial velocity of the reaction,  $V'_{max}$  is the maximum velocity of the reaction corresponding to substrate saturation of the enzyme,  $K'_M$  is the Michaelis–Menten constant,  $[S]$  is the substrate analytical concentration and  $K_i$  corresponds to the dissociation constant for substrate binding to the enzyme. The fit is poor, suggesting that other inhibition models should be taken into account.

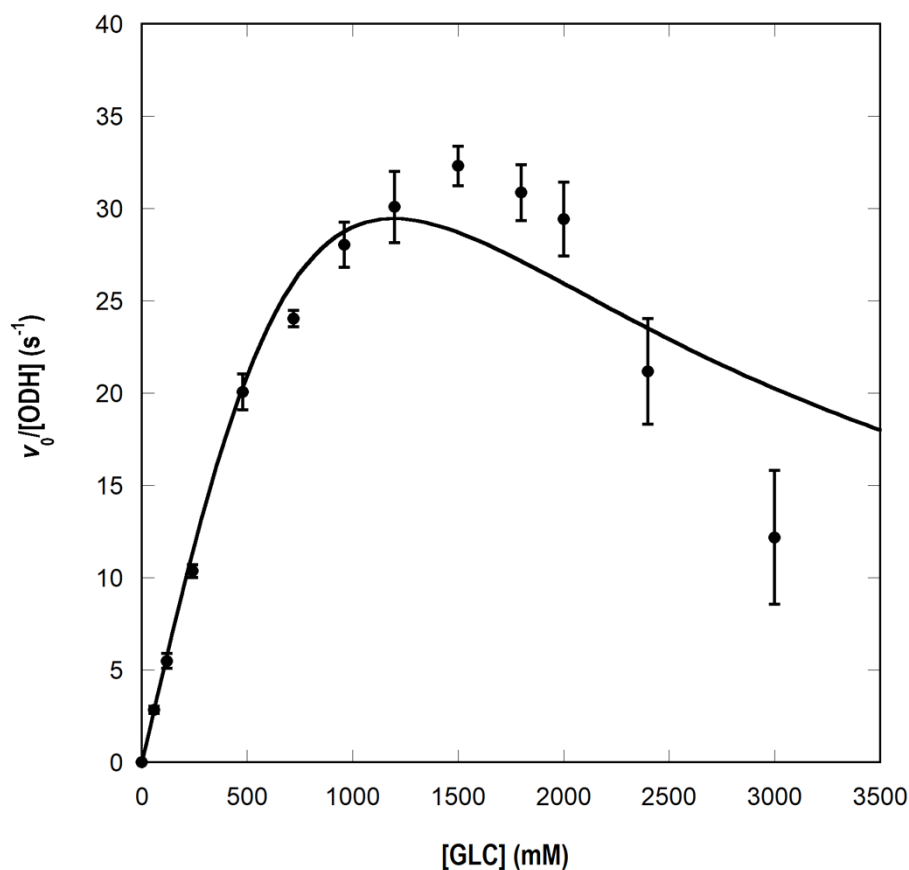

**Figure S5.** Comparison of ODH activity on different GLC anomers. Initial rates of DCIP reduction were measured on a 96-well plate as described in Methods (Spectrophotometric assays for enzymatic activity), with 25 mM of either freshly dissolved  $\alpha$ -GLC (grey empty points) or preequilibrated GLC solutions (mixtures of  $\alpha$ - and  $\beta$ -anomers, black solid points). Solid lines represent a fit to the Abs<sub>520</sub> decrease (initial velocity), and the error bars the standard deviation of three independent replicas of the reaction mixtures. Measurements start 3-4 minutes after dissolving  $\alpha$ -GLC in 30° C water, accounting for the time required to: dissolve  $\alpha$ -GLC, add it to the reaction mixtures, dispense ODH to trigger the reaction and run data collection. Within the observed time window, ODH activity is twice faster on preequilibrated GLC (both anomers) than on freshly dissolved  $\alpha$ -GLC.

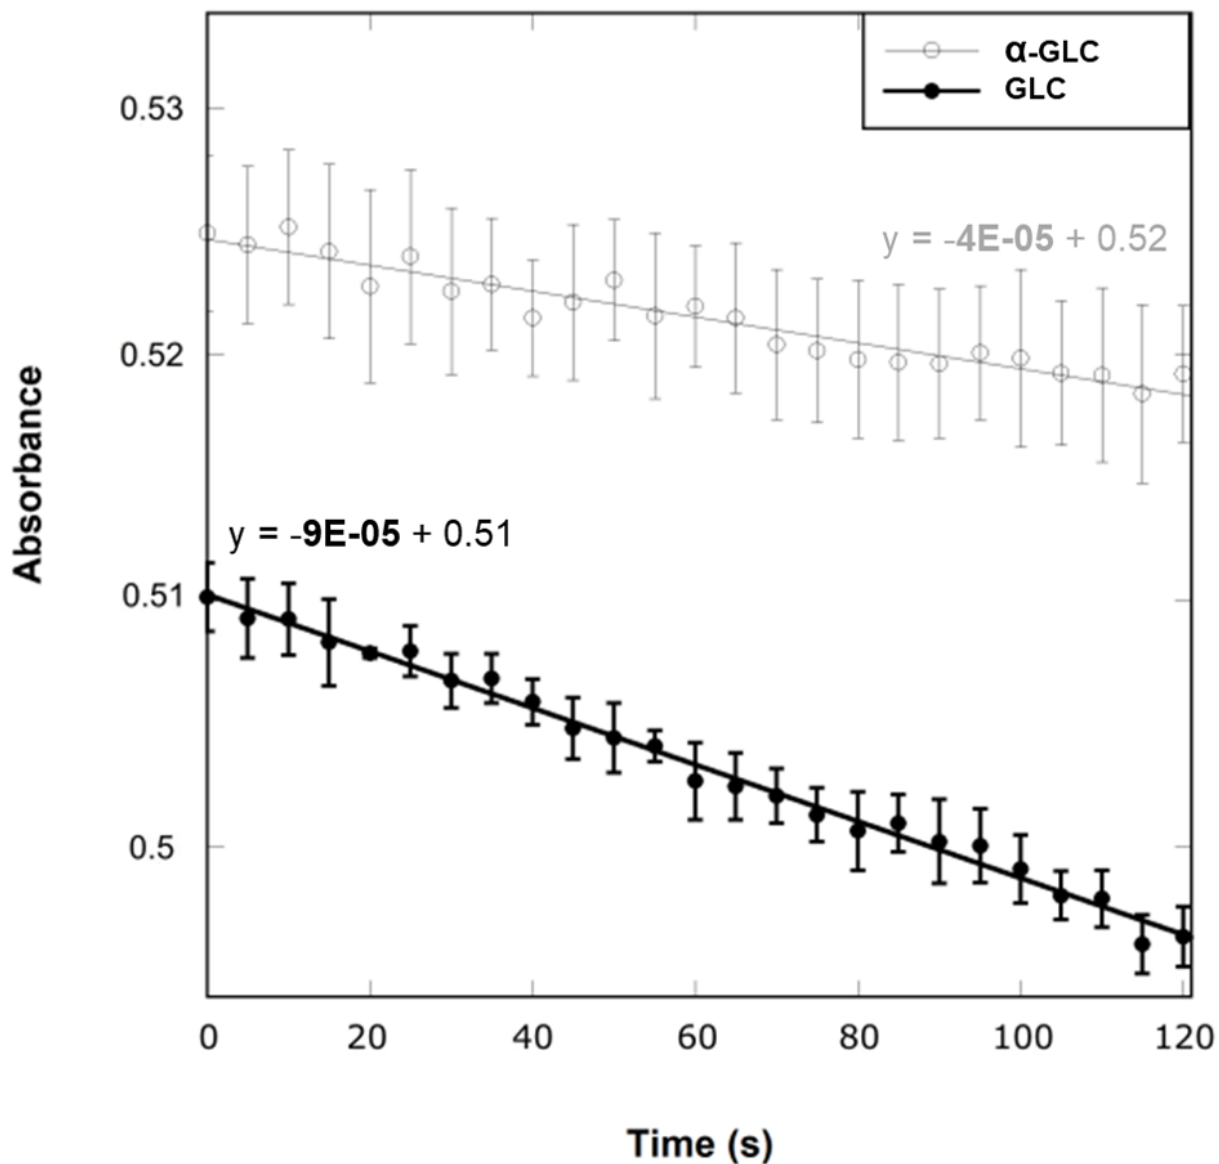

**Figure S6. Multiple sequence alignment of ODH with enzymes from the GOX/GDH clade.** Four equally distant genes per each previously defined subclade of the GOX/GDH clade [16] were used for Multiple Sequence Alignment (MSA). In the preliminary Table, subclade nomenclature, coloring scheme and order are as in [16], apart for the suggested renaming of the GDH III subclade into ODH. GOX-like and ODH-like subclades correspond to poorly defined groups that appear to be phylogenetically close to the GOX and the ODH subclades, respectively [16]. MSA analysis includes protein sequences from both Ascomycota (white background) and Basidiomycota (grey), corresponding to either characterized enzymes (bold) or to hypothetical genes from genomic data. Genes are named by their Uniprot identifier, preceded by a four letter PDB code if the three-dimensional structure is known, and by a GOX or GDH label for assigned functions. In the MSA, ODH amino acid sequence is in bold. The following coloring has been used to identify conserved residues involved in: substrate binding / catalysis / FAD ring distortion (blue); SBS1 (orange), SBS2 (yellow) and SBS3 (green); GLC-binding (H-bonds) in GOX/GDH enzymes (purple), and their loss in ODH (purple framed, golden box); G3G and GLC binding (H-bonds and CH- $\pi$  interactions) in ODH (red); and substrate-binding loop and related residues (magenta).

| Subclade             | Phylum              | Organism                                                                                                                                                |
|----------------------|---------------------|---------------------------------------------------------------------------------------------------------------------------------------------------------|
| <b>GOX</b>           | <b>ASCO</b>         | <i>Penicillium flavigenum</i><br><i>Aspergillus niger</i><br><i>Penicillium amagasakiense</i><br><i>Talaromyces flavus</i>                              |
| <b>GOX-like</b>      | <b>ASCO</b>         | <i>Pseudocercospora musae</i><br><i>Pseudocercospora fijiensis</i><br><i>Macrophomina phaseolina</i><br><i>Neofusicoccum parvum</i> UCRNP2              |
| <b>ODH-like</b>      | <b>ASCO</b>         | <i>Mycosphaerella eumusae</i><br><i>Hortaea werneckii</i> EXF-2000<br><i>Aureobasidium namibiae</i> CBS 147.97<br><i>Pseudomassariella vexata</i>       |
| <b>ODH-like</b>      | <b>BASI<br/>DIO</b> | <i>Ustilago maydis</i> 521<br><i>Moesziomyces antarcticus</i><br><i>Tilletia caries</i><br><i>Tilletia caries</i>                                       |
| <b>ODH (GDH III)</b> | <b>BASI<br/>DIO</b> | <i>Pycnoporus cinnabarinus</i><br><i>Kwoniella pini</i> CBS 10737<br><i>Armillaria solidipes</i><br><i>Galerina marginata</i> CBS 339.88                |
| <b>GDH II</b>        | <b>ASCO</b>         | <i>Stemphylium lycopersici</i><br><i>Aspergillus versicolor</i> CBS 583.65<br><i>Rosellinia necatrix</i><br><i>Trichoderma reesei</i> RUT C-30          |
| <b>GDH I</b>         | <b>ASCO</b>         | <i>Aspergillus niger</i> CBS 513.88<br><i>Aspergillus flavus</i> NRRL3357<br><i>Colletotrichum gloeosporoides</i><br><i>Aspergillus niger</i> ATCC_1015 |

  

|                                                                                                |
|------------------------------------------------------------------------------------------------|
| <b>GOX_A0A1V6T4B5</b><br><b>GOX_1CF3_P13006</b><br><b>GOX_1GPE_Q9URJ8</b><br><b>GOX_Q92452</b> |
| A0A139IH18<br>M2ZEM9<br>K2RH81<br>R1EB07                                                       |
| A0A139HTB9<br>A0A1Z5TBL7<br>A0A074W657<br>A0A1Y2DT19                                           |
| A0A0D1DW37<br>A0A081CFT4<br>A0A177U6A2<br>A0A177UVE5                                           |
| <b>ODH</b><br>A0A1B9I658<br>PBK65148<br>A0A067ST11                                             |
| A0A0L1HZM0<br>A0A1L9P605<br>A0A1W2TMR5<br>A0A024S2J7                                           |
| <b>GDH_A2QM15</b><br><b>GDH_4YNU_B8MX95</b><br><b>GDH_G8E4B4</b><br><b>GDH_G3YD20</b>          |

|                        |                                                                             |            |
|------------------------|-----------------------------------------------------------------------------|------------|
| <b>GOX_A0A1V6T4B5</b>  | SDPTKVEGKTYDYVIAGGGTGLTVAA <b>RLSE</b> NPKIKVLVIEKGFYESNDGPIIEDP----        | 88         |
| <b>GOX_1CF3_P13006</b> | TDPKDVSGRTVDYIIAGGGTGLTTAAR <b>LTEN</b> PNISVLVIESGSYSDRGPIIEDL----         | 87         |
| <b>GOX_1GPE_Q9URJ8</b> | SDPSKVAGKTYDYIIAGGGTGLTVAA <b>RLTE</b> NPKIKVLVIEKGFYESNDGAIIEDP----        | 88         |
| <b>GOX_Q92452</b>      | SDPSKVAGKTYDYIIAGGGTGLTVAA <b>RLTE</b> NPKIKVLVIEKGFYESNDGAIIEDP----        | 88         |
| A0A139IH18             | ---TAQLKAEYDYIIICGGGTAGLAVAN <b>RLS</b> ADSKNSVLVVEAGING-----               | 60         |
| M2ZEM9                 | ---TAQLKKEYDYIVCGGGTAGLAVAN <b>RLS</b> ADPKNSVLVVEAGING-----                | 60         |
| K2RH81                 | ---SSQLLESYDYIIICGGGTSGLTVAN <b>RLTE</b> LADATVVLVIEAGPESIS-----            | 65         |
| R1EB07                 | QPQGSDDLDSYDYIIICGGGTSGLTVAS <b>RLSE</b> LADATVVLVIEAGSDT-----              | 71         |
| A0A139HTB9             | SSASGIANASFDYVVCGGGLTGLTIAS <b>RLSE</b> DPSVSVLVIEAGYDNHTS-PLVNDV----       | 92         |
| A0A1Z5TBL7             | TDVNAVADKSFYDVIICGGGLTGLTVAS <b>RLSE</b> DPDISVLVIEAGYDNHND-PRVYDV----      | 104        |
| A0A074W657             | RASNMSANNSFDYVVVGGGLTGLTVAS <b>RLSE</b> NPTRVVLVIEDGQDNHND-PRVSDV----       | 74         |
| A0A1Y2DT19             | HDASVVSNTQTFDYIIAGGGVTGLTVAS <b>RLSE</b> DPSIRVLVVEGGSNWDWD-AMVHDI----      | 85         |
| A0A0D1DW37             | TDASKISNNKYDYIIIVGGGLAGLTVAN <b>RLS</b> ANSVAVKVLVIEAGNDERAN-PDVYNV----     | 81         |
| A0A081CFT4             | TDANSLSGRSYDYIIIVGGGLAGLTVAN <b>RLS</b> ANSSTSVLVIEAGNDDRNN-ADVYNV----      | 80         |
| A0A177U6A2             | TDPSIATSRTFDYIIIVGGGLAGLVVAN <b>RLSE</b> KANINVLVIEAGADTRND-DRIASL----      | 99         |
| A0A177UVE5             | TDPAVATGQVWDYVIVGGGLAGLTVAN <b>RLTE</b> NSGISVLVIEAGADTRDD-FRIRSL----       | 90         |
| <b>ODH</b>             | <b>SDPTVVNGQTYDYIVVGGGLTGTTVAA<b>RLA</b>ENSSLOILMIEAGGDDRTN-PQIYDI</b> ---- | <b>61</b>  |
| A0A1B9I658             | TDPSQVSNQTFDYVIVGGGLGGLVVAN <b>RLSE</b> NPDITVLVIEAGSDNRDD-PRVYDP----       | 81         |
| PBK65148               | TDASQANAQSFYDVIIVGAGLTGTTVAA <b>RLA</b> EDSGVTVLLIEAGADNRDD-SRVYDI----      | 83         |
| A0A067ST11             | TSASLANGQTFDYIVVAGLTGTTVAA <b>RLA</b> EDPTVTVLLIETGADNRND-SRVYDI----        | 86         |
| A0A0L1HZM0             | TVCATCASQSFHYVIVGGGPAGLLVAN <b>RLS</b> ADPNTTVAVIEAGDFAYNN-PNVTSVPKSI       | 71         |
| A0A1L9P605             | ASNAGANTNRFDFVIIIGGGTAGLAVAS <b>RLSE</b> IPDITIAVIEAGKDEGNN-PNVSSV----      | 65         |
| A0A1W2TMR5             | AMAGAARAETFYDIIAGAGTCGLVLAN <b>RLS</b> ADPAVRVAVIEPGEDVRNN-ANVTDP----       | 76         |
| A0A024S2J7             | PQVLASSTDSYDYIIIVGAGTCGLLLAN <b>RLS</b> DANYTVAIIDPGADERDN-PNVVDP----       | 74         |
| <b>GDH_A2QM15</b>      | PSTRL-CGPQYDYIVVGGGTSGLVVAN <b>RLSE</b> NPVSVLIIIEAGGSVLNN-SNVTDV----       | 75         |
| <b>GDH_4YNU_B8MX95</b> | PAGRAKNTTTYDYIVVGGGTSGLVVAN <b>RLSE</b> NPVSVLIIIEAGASVFNN-PDVTNA----       | 72         |
| <b>GDH_G8E4B4</b>      | APRDQAAATAYDYIVVGGGTSGLVVAN <b>RLSE</b> DASVSVLVIEAGDSVLNN-ANVTNA----       | 75         |
| <b>GDH_G3YD20</b>      | -KSHADSPAHYDFVIVGGGTSGLVVAN <b>RLSE</b> LSDVTVAVIEAGESALNN-FNVSNV----       | 71         |
|                        | . . . . * . * * * * : : : : * : : : *                                       |            |
| <b>GOX_A0A1V6T4B5</b>  | NAYGEI--FG---TSVDQNYLTVPLI--NNRTGEIKSGLGLGGSTLINGDSWTRPDKVQI                | 141        |
| <b>GOX_1CF3_P13006</b> | NAYGDI--FG---SSVDHAYETVELA-TNNQTALIRSGNGLGGSTLVNNGGTWTRPHKAQV               | 141        |
| <b>GOX_1GPE_Q9URJ8</b> | NAYGQI--FG---TTVDQNYLTVPLI--NNRTNNIKAGKGLGGSTLINGDSWTRPDKVQI                | 141        |
| <b>GOX_Q92452</b>      | NAYGQI--FG---TTVDQNYLTVPLI--NNRTNNIKAGKGLGGSTLINGDSWTRPDKVQI                | 141        |
| A0A139IH18             | -----TTAYWGYHSLPQKYANGRIQDLPAGKTVGGSSQINGRVYSRPDRREI                        | 107        |
| M2ZEM9                 | -----TTAYWNYHSLPQKYANGRIQDLPAGKTVGGSSQINGRVYSRPDRRSI                        | 107        |
| K2RH81                 | -----SQ---SQGDWRYPNGPERFASGRSQTLPAKVLGGSSVINGQVYLRAEQAQI                    | 114        |
| R1EB07                 | -----TTANWNYPSGPERFASGRSQTLPAKALGGSSAINGRVYLRAEQSQI                         | 118        |
| A0A139HTB9             | RTYGLA--FN---TSLDHQIHSTPVEWQDGERLLLLVTGKTLGGSGSLNGASWTKGAKSQY               | 147        |
| A0A1Z5TBL7             | RTYGEA--FE---SELDWNITSTPVPWQNDTGLLLVAGRTLGGSGSINGASWTKGPASQY                | 159        |
| A0A074W657             | RTYQQA--FE---SDLDYNMTSTPIPWRNGTKLPMAAGKTLGGSGSISGASWTKGPRTOY                | 129        |
| A0A1Y2DT19             | RTYQQA--FG---TYLDYNLTSTPIISWRNGETLPMIAGHTLGGSGSINGASWTKAPKSOY               | 140        |
| A0A0D1DW37             | DNYGKA--FG---NDLTFKFNTVPQV--GGRTKAPLGGRTLGGSTSINGAAWNRAASRAQY               | 134        |
| A0A081CFT4             | DNYGKA--FG---TDLTWHFTTVPQI--GGRTKAPLGGKTLGGSTSINGAAWNRAASRAQY               | 133        |
| A0A177U6A2             | DAYGSV--FLSSSKDINWQFTTTN-----GKTI SAGRGLGGSTSINGGAI TRADTAQL                | 150        |
| A0A177UVE5             | DQYGKG--FAANNTDINWRYTATN-----GKLV SAGKGLGGSTSINGAAWTRGDVVEL                 | 141        |
| <b>ODH</b>             | <b>YEYGA V--FN---GPLDWAWEADQ-----GKVIHGGKTLGGSSSINGAAWTRGLNAQY</b>          | <b>109</b> |
| A0A1B9I658             | YQYSVA--FN---TELDWNWPSSQ-----GRIKGGKTLGGSTSINGLAQTRGQKAQY                   | 129        |
| PBK65148               | YAYSQA--FG---TELDWSWSTDD-----GKTIHGGKTLGGSSSINGGHYTRGLDAQF                  | 131        |
| A0A067ST11             | YEYGDA--FG---SELTYSWSADQ-----GKSILGGKTLGGSSSINGAAWTRGLNAQY                  | 134        |
| A0A0L1HZM0             | LEFGLF--IG---TSIDWGYTTVPQKYAGNKTLAYWAGKALGGSTTINGMTYLRAETDQI                | 126        |
| A0A1L9P605             | VEYGGTAGQG---TQIDWSYETVEQRYAGGRKIGFHAGKAWGGTSTINGMTYIRAEFAQI                | 122        |
| A0A1W2TMR5             | ANFTVP--YG---TSIDWQYSTTPQPGAGNRTLDWHAGKAI GGTSTINGMTYIRGDKAQF               | 131        |
| A0A024S2J7             | LGWLGL--TG---TSVYWNYSIPQEKLGRRVLEYDAGRIGGTSLINGMTYIRGDKAQF                  | 129        |
| <b>GDH_A2QM15</b>      | NGYGLA--FG---TDIDWQYETINQSYAGDAPQVLRAGKALSGTSAINGMAYTRAEDVQV                | 130        |
| <b>GDH_4YNU_B8MX95</b> | NGYGLA--FG---SAIDWQYQSINQSYAGGKQVLRAGKALGGTSTINGMAYTRAEDVQI                 | 127        |
| <b>GDH_G8E4B4</b>      | NGYGLA--FG---TDIDYAYQTTAQTYANASTTLRAAKALGGTSTINGMAYTRAEASQI                 | 130        |
| <b>GDH_G3YD20</b>      | MGYSTA--FG---TEVDWAYQ TENQTYAGGLOQTIRAGKALGGTSTINGMSYTRAEDVQI               | 126        |
|                        | . . . . * : : . * : .                                                       |            |

|                        |                                                                 |            |
|------------------------|-----------------------------------------------------------------|------------|
| <b>GOX_A0A1V6T4B5</b>  | DSWEKVFVG-----EGWNWDNVFQYMQKAERSRPPTAA-QIEAGHFYDPACHGTDGTVHAG   | 196        |
| <b>GOX_1CF3_P13006</b> | DSWETVFGN-----EGWNWDNVAAYSLQAERARAPNAK-QIAAGHYFNASCHGVNGTVHAG   | 196        |
| <b>GOX_1GPE_Q9URJ8</b> | DSWEKVFVG-----EGWNWDNMFEYMKKAEEAARTPTAA-QLAAGHSFNATCHGTNGTVQSG  | 196        |
| <b>GOX_Q92452</b>      | DSWEKVFVG-----EGWNWDSMFEYMKKAEEAARAPTAA-QLAAGHYFNATCHGTNGTVQSG  | 196        |
| A0A139IH18             | DDWGQVNN-----AGWSWETLFFPYKSSSEGLRPPTKQQQKDLENTYNPDYHGVAGPVNIT   | 162        |
| M2ZEM9                 | DDWGNVNN-----AGWSWEKLFPPYKASEGLQPPTKQQORDLENKYNPDYHGTAGPVNIT    | 162        |
| K2RH81                 | DDWERAGN-----TGWNWATLFPYYLKSEQFAVPNER-QTDAGLTYTAEFHGTNGPVNTG    | 168        |
| R1EB07                 | DDWEKAGN-----TGWNWEALWPYYLKSEQITAPNER-QTDGGLTYDPDFHGTDPVNTG     | 172        |
| A0A139HTB9             | DLLPLLSGD-----ESWDWASFNQYMLKAENFHRPSDSQRDVKGAHYESGFHGYSGPVQVS   | 203        |
| A0A1Z5TBL7             | DVLPLLTGD-----DSWGWEGLNEYMLIAENFNLPEPR-EIASGARYDRAYHGQGGPVEVS   | 214        |
| A0A074W657             | DLLPLLTGD-----ESWGWDGLNQYMLGAEHFYAPSNE-LKSKGADYDGHKHFSGPVQVS    | 184        |
| A0A1Y2DT19             | DLLPLVTGD-----ESWAFDSFNEIMLSAEKFTPTPTQA-LTSKGANYVPAYHGTNGNVSVS  | 195        |
| A0A0D1DW37             | DALGALINS--ADAGWNWNGLLGYMKKSENFPVAPNQD-QRNLGAKWDPVSHGTSGLPLEIG  | 191        |
| A0A081CFT4             | DALGGLVGS-----SGWSWDGLLGYMKKSENFIAPTSA-QQAAGARYDASVHSGGPLEIG    | 188        |
| A0A177U6A2             | DNIGKLG-----QNWDSNSLQYMKKAETFTVPTNTA-QVNAGARFTAEAHGTNGPLTIR     | 204        |
| A0A177UVE5             | DNIGRLGN-----TGWNYSMSLSYMNKAKEKFTIPNGD-VASLGGQYNATSHGFSGYVSVR   | 195        |
| <b>ODH</b>             | <b>DSWSSLEPEEASVGWNWNLFYMKKAEAFSAPNDQ-QRAKGADSIASYHGTTPVQAT</b> | <b>168</b> |
| A0A1B9I658             | DSLSTFLGGDDNGYWNWDGMYFGMLKSEGFSAAPNDQ-QKDAGASSNPAYHNTSGPLQVT    | 188        |
| PBK65148               | DAWSSLEDEYSDVGWNWDGMLNYMKKSEAFSAPNGQ-QSAKGAQFNGDYHGWSGPVQVT     | 190        |
| A0A067ST11             | DSWSALLEPSEASVGWNWQGLWDYMQKSETFSAPNSQ-QAAKGAQAISYHGFSGPVRVT     | 193        |
| A0A0L1HZM0             | DAWEDLGN-----PGWNWDTLWEYFLKQEGFQPPTDK-LEQRGAAYEVGAHGRDGLAVG     | 180        |
| A0A1L9P605             | DSWETLGN-----KGWSWASLWPYHLKSERYETPTKA-QLAAGASYVDSYHGRDGPLNVA    | 176        |
| A0A1W2TMR5             | DAWEALGA-----KGWNWETLYPYKKAKEKFTVPSDA-QAAAGATYDPEVHGDAGHVHTG    | 185        |
| A0A024S2J7             | DAWEQLGN-----PGWNWTTMLKHFKKIEQFFPPLPW-QETAGALYEDEYHGTSGEMHVG    | 183        |
| <b>GDH_A2QM15</b>      | DAWQTIGN-----EGWTWDSLFPYRKSENLTAPTAS-QRARGATYDPSANGEEGPLSVA     | 184        |
| <b>GDH_4YNU_B8MX95</b> | DVWQKLG-----EGWTWKDLLPYLKSLENLTAPTSS-QVAAGAAYNPAVNGKEGPLKVG     | 181        |
| <b>GDH_G8E4B4</b>      | DAWETVGN-----EGWNWDALLPYLKSSETFQAPDAERSIKGHISYESDVHGHGPLYTA     | 185        |
| <b>GDH_G3YD20</b>      | DNWEVLGN-----DGWNWKNLQYKSEGFQVPTKD-QIAHGASYNASYHGLNGLPKVG       | 180        |
|                        | * * . * *                                                       | : . * :    |
| <b>GOX_A0A1V6T4B5</b>  | PRD-----NGKPWSPLMRALMNT-VSAFGVPVQKDFHCGHPRGVSM                  | 236        |
| <b>GOX_1CF3_P13006</b> | PRD-----TGDDYSPIVKALMSA-VEDRGVPTKDFGCGDPHGVSM                   | 236        |
| <b>GOX_1GPE_Q9URJ8</b> | ARD-----NGQPWSPIMKALMNT-VSALGVPVQQDFLCGHPRGVSM                  | 236        |
| <b>GOX_Q92452</b>      | ARD-----NGQPWSPIMKALMNT-VSALGVPVQQDFLCGHPRGVSM                  | 236        |
| A0A139IH18             | YP-----AV-GVPEYFNILEDT-AKTFSIPRNRDFNGGDARGLST                   | 200        |
| M2ZEM9                 | YP-----AV-GVPDYFRLLLEET-AKAFSIPRIRDFNGGDARGLST                  | 200        |
| K2RH81                 | WP-----TEVAIETYLNQLEEA-YASIGMPRIQDPNGGEMRGLST                   | 207        |
| R1EB07                 | WP-----AEASIETYLSQLEEA-YASIGMPRIDDPNGGNMRGLST                   | 211        |
| A0A139HTB9             | FG-----AGMYGGTQLASLKASENAISNFTRNFDAASGQTNGGTI                   | 243        |
| A0A1Z5TBL7             | FA-----AGIFEKPOQDALEASYKWEGLERIDDAAGEVNGATI                     | 254        |
| A0A074W657             | FA-----QGMFGSIQPPALNASQQVW-GLEHVSDAASGKVNGATT                   | 223        |
| A0A1Y2DT19             | FA-----QGIFFSIQLPAINASQMVWEGLEVAVDAASGEVNGVTT                   | 235        |
| A0A0D1DW37             | FTQIRNNRRSTTNVGGASQWKRMTGPGQPPAFIKAVGETLGVQVDDQCSGQANSVAF       | 251        |
| A0A081CFT4             | FSQIRNQRR-----SGGASQEWRRMFIGPQQAFAIAAIGETLGVQHVDQCSGANSVAV      | 243        |
| A0A177U6A2             | FGEVQSSSRDLNLSNSSAQLKRFYTGYPYQSSFVQSVKALGVDRINDLSDGHTNGVAV      | 264        |
| A0A177UVE5             | FGDVVKDNTTQR-RSSPSAGLHERFMTGPGQPPAFVKAVDQTLGIKPLADVAAGKTNGVAV   | 254        |
| <b>ODH</b>             | <b>FP-----DEMYGGPQMPAFVNTVVNVITGMPHYKDLNGGTPNCVSI</b>           | <b>208</b> |
| A0A1B9I658             | YP-----DELPHGAQQKYFKEVVSTNFSVASSPDADDGNANVAVF                   | 228        |
| PBK65148               | YP-----DEMYGGPQQGDFVNTIVNLTGIYHSPDLNGGGANSVSI                   | 230        |
| A0A067ST11             | YP-----DDMYGGPQQLAFFVDTIVALTGISHSFKDLNNGGTPNCVSI                | 233        |
| A0A0L1HZM0             | FT-----PYLVGQGFADLLKTT-SEAMGIPYNQDPNDGVMRGFNT                   | 219        |
| A0A1L9P605             | YQ-----YGLQNGSFASLAKET-WEAFGMPFNPDPVNGGNIRGFSV                  | 215        |
| A0A1W2TMR5             | FP-----FSLVNGSLHDLAVDT-WAALGYELNEEVNAGSVRGFGA                   | 224        |
| A0A024S2J7             | FN-----PALLSGSFYGDVKAS-WAALGQTLNRDASSGDTAGFDV                   | 222        |
| <b>GDH_A2QM15</b>      | WP-----DI-PANNLTNTLNAT-FQGLGVPWTEVDVNGGKMRGFNV                  | 222        |
| <b>GDH_4YNU_B8MX95</b> | WS-----GSLASGNLSVALNRT-FQAAGVPWVEDVNGGKMRGFNI                   | 220        |
| <b>GDH_G8E4B4</b>      | YA-----YGSTNDSYPTSLNAT-YQALNVPWKEDIAGGSMVGFAS                   | 224        |
| <b>GDH_G3YD20</b>      | WP-----NSMTNSSVFPVLEQT-FEKLGVQYNPDSEGGKVMGFV                    | 219        |



|                        |                      |                                                         |             |     |
|------------------------|----------------------|---------------------------------------------------------|-------------|-----|
| <b>GOX_A0A1V6T4B5</b>  | IPNNL----            | HENQIRADAAREWLLPNY-QRDNLQILTGQVKVGLFNQTA-----           | SGPK        | 285 |
| <b>GOX_1CF3_P13006</b> | FPNTL----            | HEDQVRSDAAREWLLPNY-QRPNLQVLTGQYVGVKVLSSQNG-----         | TTPR        | 285 |
| <b>GOX_1GPE_Q9URJ8</b> | IMNNL----            | DENQVRVDAARAWLLPNY-QRSNLEILTGQVMGVKVLFKQTA-----         | SGPQ        | 285 |
| <b>GOX_Q92452</b>      | IMNNV----            | DENQVRVDAARAWLLPSY-QRPNLEILTGQVMGVKVLFKQTA-----         | SGPQ        | 285 |
| A0A139IH18             | YPGFFVINAQRE         | QLRESAREAYYLPVV-GRPNLELLDETMCQRIDWENG---G--GGDLK        |             | 255 |
| M2ZEM9                 | YPGFFVINAQRE         | QRRESSREAYYLPV-GRTNLELIDETMCQRIDWEKSS---D--GGDLK        |             | 255 |
| K2RH81                 | YPRTRQA-INDR         | DVRESAASAYYEPVR-DRTNLDVLLNTSVLRIVWAEND---DADGNAI        |             | 262 |
| R1EB07                 | YPRTQQN-VNDQ         | DVREDANTAYYQQA-DRTNLDVLTNTSCLRIVWAESD---DADGNAI         |             | 266 |
| A0A139HTB9             | IPNMVVP--EEN         | QNRSSPFTAYAQNQVQERNNFLILTGHRVTEIVWQETK----ERAPLV        |             | 297 |
| A0A1Z5TBL7             | IPNMVVT--DGS         | QNRSSPFTAYAMHQVEQRDNFMILTQQRVTEIVWKE-----GDDMI          |             | 305 |
| A0A074W657             | IPNMVQP--GES         | QNRSSPYTAYILGEPEKRGNLVILTGHRAVEIRWRNCTSLSDRILT          |             | 281 |
| A0A1Y2DT19             | IPNMVQP--DES         | ETRASPYPASWIKGTADTRPNLVILLGHRVVKLDWSSTE---EGADLV        |             | 289 |
| A0A0D1DW37             | TPNSI----            | GVNGQRTSAASAYYTPVQ-NRDNLTLTGTMAKNLLWDAAT----SSNLLR      |             | 302 |
| A0A081CFT4             | TPNSI----            | GTNARRTSSASAYYTPVQ-GRENLTVLTGTRARNLLWGAQS----ASG-LG     |             | 293 |
| A0A177U6A2             | TPNSMLP--GSG         | NLRSSSATAYLTPIEQKRNSLVVLTTRWGKTTWSSTA----RT--PT         |             | 316 |
| A0A177UVE5             | FPNTFLP--GPG         | KLRSSSAIAYLSPIEFSRNSLVVLTNFRGWKLIWDPTK-----N--AT        |             | 305 |
| <b>ODH</b>             | <b>TPLSINW--HDD</b>  | <b>DHRSSIEAYYTPVENNRQGWTLIDHMATKVLFDG-T----NA-PLT</b>   | <b>260</b>  |     |
| A0A1B9I658             | HPNTISW--QDS         | DHRSSSATAYYSPVSE-RSNLAILLOHQATKIQFDGN-----K             |             | 275 |
| PBK65148               | TPLTLNW--HDD         | DHRSSVEAYLSPVEGIRTNWLTAEHQVTKINWANAG----SI-PLT          |             | 283 |
| A0A067ST11             | TPLTINW--HDS         | DHRSSSAMAYLTPVESVRTNWLTLVTHQVTKINWNT-G----GI-PLT        |             | 285 |
| A0A0L1HZM0             | WPMTLNE---TG         | PTREDGARAFYYPVA-SRPNLHVFPNSMATRIIWDSDN---SAAAGVL        |             | 272 |
| A0A1L9P605             | WPQTLDR---EA         | NVREHSARAYYYPVR-DRSNLVIF-RGRVDRVSWAETN---ES--KVL        |             | 265 |
| A0A1W2TMR5             | WPQTLDR---DR         | NIRFDAARAYYDIE-DRPNLTLI-KGTVKKLTWASCT---ASQDAV          |             | 276 |
| A0A024S2J7             | WPQTLDP---VK         | NVRWDAATAFYWPVQ-DRPNLALL-NGTVSRILWKNDE---AD--VPE        |             | 272 |
| <b>GDH_A2QM15</b>      | YPSTIDY---TAY        | VREDAARAYYWPVIA-SRPNLHMLDFTFVNRLVWKNGG---SQ-GNAT        |             | 274 |
| <b>GDH_4YNU_B8MX95</b> | YPSTLDV---DL         | NVREDAARAYYFPYD-DRKNLHLENTTANRLFWKNGS---A--EEAI         |             | 271 |
| <b>GDH_G8E4B4</b>      | YPKTLNQ---DL         | NIRWDAARAYYFPYE-NRTNLKVVLTNTAKKLTWASAT---NG-TDAT        |             | 276 |
| <b>GDH_G3YD20</b>      | HPDTLDR---EM         | NVREDAARAYYWPYE-ARSNLKII SNTRANKVIWANTT---Q--GEAV       |             | 270 |
|                        |                      | * : * . . .                                             |             |     |
| <b>GOX_A0A1V6T4B5</b>  | AVGVNFGTNK--AV       | NFNVAKQEVLLAAGSAISPLILEYSGIGIKSVLDKAGVKQLELPL           |             | 343 |
| <b>GOX_1CF3_P13006</b> | AVGVEFGTHK--GN       | THNVAKHEVLLAAGSAVSPTILEYSGIGMKSILEPLGIDTVVDLP           |             | 343 |
| <b>GOX_1GPE_Q9URJ8</b> | AVGVNFGTNK--AV       | NFDVFAKHEVLLAAGSAISPLILEYSGIGLKSVDQANVTQLLDLP           |             | 343 |
| <b>GOX_Q92452</b>      | AVGVNFGTNK--AV       | NFDVFAKHEVLLAAGSAISPLILEYSGIGLKSVDQANVTQLLDLP           |             | 343 |
| A0A139IH18             | ARGVEISNVD--NK       | -TVVRARHEVILSAGVYRTPGILEYSGIGNPKILKAHKIDTKIELP          |             | 312 |
| M2ZEM9                 | AHGVEISNVD--NK       | -TVIHARKEVILSAGVYRTPGILEYSGIGNPKILKSHKIDTKVDLP          |             | 312 |
| K2RH81                 | AAGVEVATAD--G        | TAVLNATQEVILAAGAYRSASILEYSGVNSQILQGLGIATKVYLP           |             | 320 |
| R1EB07                 | AAGVEVASAD--G        | STATLNATAEVIIVAAGAYRSASILEYSGVNSQILQSLGIDTKVYLP         |             | 324 |
| A0A139HTB9             | ADGVHFQSS-KNS        | PVQFVKANREVLAAAGSLQSPQILELSGVGSDVDLGAAGVELKHELK         |             | 356 |
| A0A1Z5TBL7             | AERVHFQGC-RDC        | DISFVKADREVLASAGSLQSPQILELSGVGDPDVLEAAGVPLKKAAP         |             | 364 |
| A0A074W657             | ADGVYYQAD-RHS        | ERLFAKATREVLAAAGSMQSPQLELSGVGDPAILDKAGVPVRKALM          |             | 340 |
| A0A1Y2DT19             | ASGIQFQOS-RSS        | PILTAHASRDVILAAGSMQSPQLELSGVGDATVLANAGIPLVKSVP          |             | 348 |
| A0A0D1DW37             | SSGVVVQQG-RNG        | NQIRLVANKEVILAAGALNTPVLLQRSGVGAKTDLNSIGVDQRIELA         |             | 361 |
| A0A081CFT4             | SSGVVVQQS-HDG        | NLVTINAKREVVLAAGALNTPVLLQRSGVGAKADLDSIGVDQKLALD         |             | 352 |
| A0A177U6A2             | ATGVIIQQK-NGG        | PYNVKASREIIVAAGAIRSPVFLEHSGIGDANILRNINVPKVDLP           |             | 375 |
| A0A177UVE5             | ATGVVIQQS-PGG        | PYNSAKREVIVAAGSIKSPIFLEHSGVGNATVLSKLRVPLKVNLP           |             | 364 |
| <b>ODH</b>             | <b>AVGIEFGASDATG</b> | <b>NRYSKAFARKEVILAAGAIQTPALLQLSGIGSDVVLGPLGISTLSDLK</b> | <b>320</b>  |     |
| A0A1B9I658             | ATGVEYGTSD--G        | QRYTVNAGKEVII SAGAIQTPALLQLSGVGDPAALLNGLGINVANVS        |             | 333 |
| PBK65148               | ASGVEFAPTS           | GGSTRYTATANREVI IACGSIQSPALLQLSGVGDSDVVLGPLGIDTHIDLK    |             | 343 |
| A0A067ST11             | ASGVEFAPAS           | GGSTRYTASARREVILAAGAIQTPALLQLSGIGDSAILGPLGITTMIDLK      |             | 345 |
| A0A0L1HZM0             | ASGVEIVTAK--D        | VTEI HASKEVVVAAGAIRSPAFLHSGVGNPAVLEPLGIETVNPLH          |             | 330 |
| A0A1L9P605             | AEGVEYTTED--G        | KAKILYAEKEVIVSAGAVRTPAILELSGVGNPELLKQLDIPVKVPLS         |             | 323 |
| A0A1W2TMR5             | ADGVEYVTPD--G        | GLIKVTAAKEVILSAGALRSPLILESSGVGNPSSLKLGKPKIDLP           |             | 334 |
| A0A024S2J7             | ASGVEYLTPD--G        | NIKTVNARREVILSAGALRTPLEILELSGIGNPSILNGLGIETVVNSP        |             | 330 |
| <b>GDH_A2QM15</b>      | AAGVEITSSN--G        | TISVIGASQEVII SAGSLKSPGILELSGIGNRDILERYNISVRVDLP        |             | 332 |
| <b>GDH_4YNU_B8MX95</b> | ADGVEITSAD--G        | KVTRVHAKKEVII SAGALRSPLILELSGVGNPTILKKNITPRVDLP         |             | 329 |
| <b>GDH_G8E4B4</b>      | ASGVEITAAD--G        | TTSVVTANKEVII SAGALVSPLLLLELSGVGNPAVLSQYGIETVVVELP      |             | 334 |
| <b>GDH_G3YD20</b>      | AVGIEVTNAY--G        | TET- IYADKEVILSAGALRSPAILELSGIGNPDVLNKHNIPVKVNIT        |             | 327 |
|                        | : :                  | * : : : : *                                             | : : * : * * | * : |

|                        |                                                                     |            |
|------------------------|---------------------------------------------------------------------|------------|
| <b>GOX_A0A1V6T4B5</b>  | -VGLNQDQTTTTVRSRANN-----APGQQAAAYFANFTEVLGDHAAQGIELLD               | 391        |
| <b>GOX_1CF3_P13006</b> | -VGLNLQDQTTATVRSRITS-----AGAGQQAAWFATFNETFGDYSEKAHELLN              | 392        |
| <b>GOX_1GPE_Q9URJ8</b> | -VGINMQDQTTTTVSSRASS-----AGAGQQQAVFFANFTETFFGDYAPQARDLLN            | 392        |
| <b>GOX_Q92452</b>      | -VGINMQDQTTTTVSSRASA-----AGAGQQQAVFFANFTETFFGDYAPQARELLN            | 392        |
| A0A139IH18             | GVGENLQDQAQGNIFFKKNSTITFPATVGEIITNYLIHATYEDILGDEAPAVQRRVN           | 372        |
| M2ZEM9                 | GVGENLQDQAQGNIFFKKNSTITFPATVGEIITNYLIHATYEDILGNEAASMQRVN            | 372        |
| K2RH81                 | GVGEHLMDQANNILTFEPAPEA-----GFTGTTAYVAYASVADVFGDEAAVAEEVR            | 372        |
| R1EB07                 | GVGEHLMDQANNILTFEPAADA-----GFTGTTAYVAYANVTDVFGPDAPTVAAEEVR          | 376        |
| A0A139HTB9             | GVGAHQEQTKNLTLYQARPGVNY-----NGTGPPSSIVFPDAAQLLGENATTWYSTVK          | 410        |
| A0A1Z5TBL7             | GVGKHMQEQTKNVSVVQNAQ-EMEY-----DGSGPPSGIAFPNVHQLLKNSSATYDYVM         | 417        |
| A0A074W657             | GVGKNLQEQTKNTIITYTPK-SDDF-----EGSGPPSAIAFPNVHQLLGNKSSAVHKETL        | 393        |
| A0A1Y2DT19             | GVGKNLQEQTKSSLYYTPI-STAW-----NGTGPSTAIAFPNAWQLLRSNASAVYNATI         | 401        |
| A0A0D1DW37             | GVGKNLQDQTMTTIGSR--ANVNY-----AGGGPSTATIAMPNIQQIMS-NSTAVRSYIT        | 412        |
| A0A081CFT4             | GVGKNLQDQTMTTLGSR--ANVNY-----SGGGPSSAIGMPNVNQVFS-NATAVRSYIS         | 403        |
| A0A177U6A2             | GVGKNLQEQTMSVFGASRKNVGSF-----GGVGP SNLIAQPAAGQLFS-NATAVRSYIE        | 428        |
| A0A177UVE5             | GVGANLQEQTNVGLGIPN-GTIPY-----GGVGPGNVVAFGSVAQLMPNNTAVRQAI           | 417        |
| <b>ODH</b>             | <b>TVGKNLQEQTQNAIGAK-GNGFDP-----DGHGPTDAIAFPNIYQVFGSQATS AVQTIQ</b> | <b>373</b> |
| A0A1B9I658             | GVGKNLQEQTMNSVGTVPDGFDF-----DGRGPPDCIAYPDLGLGSSSSNDIASTIS           | 387        |
| PBK65148               | TVGRNLQEQTMNSLGAD-GN-VDY-----GGSGPDAIAYPNIYQVFGDEAAASVSKI           | 395        |
| A0A067ST11             | TVGKNLQEQAMSTHGAG-GNGFDE-----GGRGPTDVIAYPNLYQIFGSNANATVSR           | 398        |
| A0A0L1HZM0             | SIGANLPDQPQNGMVFSSTNWTG-----YPTFVSYLTASDLFGEELAGLAEVVR              | 380        |
| A0A1L9P605             | SVGENAIDQPNFTFISYSSTKNFTG-----IAPYVTYMTASDVFGPETQRIADEIS            | 373        |
| A0A1W2TMR5             | GVGEYLQEQPNTALVYSGTQNVSG-----FAPYATFSTAGDLFGDETPAIKASTS             | 384        |
| A0A024S2J7             | GVGENLIDQSNVALTYSTKESFPG-----YAPYATFVNATSLFGDGVEALAASTK             | 380        |
| <b>GDH_A2QM15</b>      | TVGENLQDQTNAGLGASTTPGLTG-----TKTVVYPNVYDVFGNDTLAVAQSVR              | 381        |
| <b>GDH_4YNU_B8MX95</b> | TVGENLQDQFNNGMAGEGYVLAG-----ASTVYTPSISDVFGNETDSIVASLR               | 378        |
| <b>GDH_G8E4B4</b>      | TVGENLQDQINNELIYSPPTNFTSTY-----DSGVGAFVAYPSASHVFGTNESSASEELK        | 389        |
| <b>GDH_G3YD20</b>      | TVGENLQDQTNALSWEVDLTLTG-----LATFSVLPSVNQLYGDNVLTALASYVK             | 377        |
|                        | :*        :*                                                        |            |
| <b>GOX_A0A1V6T4B5</b>  | TKLDQWAEETVARGG--FHNVTALKIQYENYRNWLLDE--DV-AFAELFFDTE-----          | 439        |
| <b>GOX_1CF3_P13006</b> | TKLEQWAEAEVARGG--FHNTTALLIQYENYRDWIVNH--NV-AYSELFLDTA-----          | 440        |
| <b>GOX_1GPE_Q9URJ8</b> | TKLDQWAEETVARGG--FHNVTALKVQYENYRNWLLDE--DV-AFAELFMDTE-----          | 440        |
| <b>GOX_Q92452</b>      | TKLDQWAEETVARGG--FHNVTALKVQYENYRNWLLDE--DV-AFAELFMDTE-----          | 440        |
| A0A139IH18             | ASLGDYATMISNRINNS-LSADQILNSLKVQYEAIFDT--PV-PVVELFSGQAI----NN        | 424        |
| M2ZEM9                 | ASLGDYATTISNRINNS-LSSDQILNSLQVQYDAIFNT--PV-PVVEIFSGQAV----NN        | 424        |
| K2RH81                 | AALPDYAATIAAQNNNA-TSAEELLPLLEIQYTSIFET--GI-TAFELLKGLEF----QP-       | 424        |
| R1EB07                 | AALPDYAATIASQNNNA-TSAEDLLPLLEIQHASIFDA--QI-TAFELLKGLEF----QP-       | 428        |
| A0A139HTB9             | SGLQDYANSLEERSL--VANAKATHHILQAQLDNIFNA--TDVAASEIFFTINT----TH        | 462        |
| A0A1Z5TBL7             | ETLPQYCELEKQKGL--VVNATATHTILEAQVNNLFKQ--NA-AASEVFFTVSP----GT        | 468        |
| A0A074W657             | ANLASYAADLEAQGL--VANATATHEILRLQVANLFDQ--SE-AAAEIFFTLAAATDSAP        | 448        |
| A0A1Y2DT19             | ASLPAYAAQLAASGS--VVNATATAQIMRLQIESLFAN--NE-PAAEVEFTIDT----AG        | 452        |
| A0A0D1DW37             | SNLDGWANQLLSQGH--VASKEGVLAQWRSASLIFDQ--KA-PVVELFFDTEGF----PA        | 463        |
| A0A081CFT4             | SNLNAWADTLVSAGH--VASKSGLLAQWTSAVSLIFDQ--AA-PIVEMFFDTGY----PA        | 454        |
| A0A177U6A2             | SNYQNWQAQAVSGGG--AVNTDGLIAQWRLQTEVLFTD--NV-GAVEMFVDSGY----PN        | 479        |
| A0A177UVE5             | SKYTTWARDAVVAGA--AVNSAGLIAQWKLAVSALFDY--NV-GATEFLFTTGF----PT        | 468        |
| <b>ODH</b>             | <b>SSLSAWAKTQAAAGA--LSADALNTIYQTOADLIINH--NA-PVVELFFDSEGF----PD</b> | <b>423</b> |
| A0A1B9I658             | DNIAQYAQDAYDAGA--VASVEAANTIFGIQODLMVNK--NS-GLVEAFFDSEGF----PN       | 438        |
| PBK65148               | SSLSWASSQAG-SA--LSADALEQIYNIQADLIINH--NA-PIVELFFDSEGF----PA         | 444        |
| A0A067ST11             | SSIASWAASQAD-SG--LSANALQQIFQVQADLIINN--NA-PVMEFLFDIGY----PD         | 447        |
| A0A0L1HZM0             | ANLSAYAATIVEDYANGTISVETQEHLSSHQVDLIFDSESKV-PLAELLWAPT-----G         | 433        |
| A0A1L9P605             | SEIKSWAEQVSADSPGQGFPAIAIEHQYRVQHDLIFNQ--DT-AITEILTTSL-----G         | 424        |
| A0A1W2TMR5             | AQIPGWAEKVVAASNGA-VKAAVEKLFRIQHDLIFEK--NV-TIGETLTAIF----GG          | 435        |
| A0A024S2J7             | KSLPIWAQQIAAQNTNGV-ISARAIEHRLQVQHDLIFKK--GV-TIAEILSSAS-----G        | 430        |
| <b>GDH_A2QM15</b>      | RQLKQWANETAQVSSGT-MKAEDLEALFQLQYDLIFKD--KI-TIAEILYYPG-----ST        | 432        |
| <b>GDH_4YNU_B8MX95</b> | SQLSDYAAATVKVSNHG-MKQEDLERLYQLQFDLIVKD--KV-PIAEILFHPG-----GG        | 429        |
| <b>GDH_G8E4B4</b>      | SQLTAYADTVAIANGNV-TKASDLLDFQLQYDLIFKD--QV-PFAEVLIIYA----KG          | 440        |
| <b>GDH_G3YD20</b>      | SQLASYAKTVASASNGA-VKEANLVEAFERQYDLIFNS--QV-PYTEVVFAPS-----G-        | 427        |

:.

:.

\* .

Substrate-binding loop

GOX\_A0A1V6T4B5 GKINFDIWNLIPFTRGSVHILSSDPYLW----QYANDPKFFMNELDLLGQAAATKLGREL 495  
GOX\_1CF3\_P13006 GVASFDVWDLPLPFRGYVHILDKDPYLH----HFAYDPQYFLNELDLLGQAAATQLARNI 496  
GOX\_1GPE\_Q9URJ8 GKINFDLWDLIPFTRGSVHILSSDPYLW----QFANDPKFFLNEFDLLGQAAASKLARDL 496  
GOX\_Q92452 GKINFDLWDLIPFTRGSVHILSSDPYLW----QFANDPKFFLNEFDLLGQAAASKLARDL 496

A0A139IH18 TTVNMEFWPLIPLSRGSCHIAGSNADLAAQEP--FIDVNWFMLEWDWDIYIASGRFVVRKL 482  
M2ZEM9 NVVNMEFWPLIPLSRGSCHIAGANADLAAEAP--FIDVNWFMLEWDWEIYIAAGRFRVRL 482  
K2RH81 TRLECEVWSTLPPFSRGNVHITARPPTDGGSTPALAINNNYFQLDYDNRAQIAAARFVRNL 484  
R1EB07 TRLDCEVWSTLPPFSRGNVHITAAAPT DGGSTPALAINNNNFQLDYDTRASVAAARFVRRL 488

A0A139HTB9 NLIGIDNWNLIVLSRGS SAHIRTNSTWDN-----PVVNPSYFDHPLDQEFQLATQKLSRQI 517  
A0A1Z5TBL7 GQLGIDFWNLIVLARGTAHISSNSSWDH-----PIVEASYFGHPLDMMIQRETCKQSREV 523  
A0A074W657 ATVGADLWNLIVLARGTIHITSNNSFDL-----PEIEPSYFGHPLDLQLQTLATQQAQV 503  
A0A1Y2DT19 QTVGADIWNLIPLARGTVHVQSDNSWDQ-----PAIDAAFYGHIELDTTLQVLATRQARDV 507

A0A0D1DW37 NSYGIDIWTLPLPFSRGSIRATSQNPYDG-----ARIDPNYFGLPIDMDMQVASLRASRV 518  
A0A081CFT4 NSYGIDLWTLPLPFSRGSVRATSGNPFDA-----PRVDPNYFGLPIDMDMQVQSLRAARV 509  
A0A177U6A2 NGFGVEMWPLLPSYRGSVHTSSASTFAK-----TIVDPYFVSPFDMMQVAGCRGVRV 534  
A0A177UVE5 NDYGIELWPLLPSRGSYVHAVSADAFSN-----ATVNPRYFVSPFDMDLQVASSRAARI 523

ODH -DVGIVWPLLPSRGNVTITSNNPFAK-----PSVNVNYFSVDFDLTMHIAGARLSRKL 477  
A0A1B9I658 GGLGIDLWQLLPPSRGTVKITSTDPFNY-----PSIDPRYFSADVDLKIQIAGLRMARKI 493  
PBK65148 -TLGIDQWQLLPPSRGTVQISTTDPFTQ-----PAVNVNYFSVDWDLVQIASARLSRTI 498  
A0A067ST11 -TLGMLAWNLLPFSRGNVKITTTDPFTQ-----PQVTVNYSVDFDLVQVAGARLARKI 501

A0A0L1HZM0 NQIIAQLWNLPLSRGSIHINSTDATLP-----PRIDPAFLQLPIDRYVQAAAAIRVRKY 488  
A0A1L9P605 PLVGTAFWISLPPSRGSVHIHSSDPGVY-----PSLDPNYFAAEWDLVFORRIAQILFRY 479  
A0A1W2TMR5 EFLVSAWMLLPPSWGSVHLTSVDAINA-----PAIDPKYFLVDFDLVQIGLGRTAQKF 490  
A0A024S2J7 TTAISAWYDWTLPFSRGSVHLSSANDINT-----PAINPRFLSVDFDLAVQVAVGRLATKF 485

GDH\_A2QM15 SSISAQYWALMPFARGHVHIASADPTAK-----PVINPNYKFDWDLTSQIYAVAKYVRKT 487  
GDH\_4YNU\_B8MX95 NAVSSEFWGLLPPFARGNIHISSNDPTAP-----AAINPNYFMFEWDGKSQAGIAYKIRKI 484  
GDH\_G8E4B4 -SWGAEYWGLLPPSRGSIHISQANSTAG-----ALINPNYFMDLDYDVELQVATAKFIRSV 494  
GDH\_G3YD20 NSFAVEYWPLLPPSRGSVHIQSANASY-----PAINPNYFMFDQDAEAQVTVAQYIRKA 482

\* : : \* : \*

GOX\_A0A1V6T4B5 SSAGEMKKY-YAGETIPGDNL-----PQDA--TVEQWEDYVM-----MNFRRPNWH 537  
GOX\_1CF3\_P13006 SNSGAMQTY-FAGETIPGDNL-----AYDA--DLSAWTEYIP-----YHFRPNYH 538  
GOX\_1GPE\_Q9URJ8 TSQGAMKEY-FAGETLPGYNL-----VQNA--TLSQWSDYVL-----QNFRRPNWH 538  
GOX\_Q92452 TSQGAMKEY-FAGETLPGYNL-----VENA--TLSQWSDYVL-----QNFRRPNWH 538

A0A139IH18 FATPPLANF-TTEETQPGLDNL-----PIDA--SDDEWRDYWS-----DNFRAGVWH 525  
M2ZEM9 FATQPLANL-TTEETQPGYKNL-----ALDA--SDDEWKDYWS-----DNFRAGVWH 525  
K2RH81 YALPPLNGSSVLDEIAPGLATV-----PPDA--TDDEWEVWLK-----GQFRSAVWH 528  
R1EB07 YGLAPLNGSAVLDEIAPGLATV-----PPDA--GDDEWEVWIK-----GQFRSAVWH 532

A0A139HTB9 FNTEPLASYV-VEELEPGLDRV-----PVHA--SDEAWEAWMK-----REFTSVVWH 560  
A0A1Z5TBL7 YQTEPLAQYV-KSELVPGKA-V-----SQEG--TDEEWEQWMK-----ETFTSVVWH 565  
A0A074W657 YSTSPLAEMV-DKNILPATLP-----V--TYEAWETFVK-----DTFTSVVWH 542  
A0A1Y2DT19 YAAEPLASMV-SGEITPGLERV-----ALEA--DDAAWTEWVK-----SEFTSVVWH 550

A0A0D1DW37 LQNSNLRSLTYNGETTPGFSLI----PDGPNNG--RYSRWRDWILGTLPNGGSGFAAVSH 572  
A0A081CFT4 LKNSHLRSLTYNGETTPGFGLI----PDGPNNG--SYAKRAWILGTLQGGGSGFAVSH 563  
A0A177U6A2 YQTSPVSDLFAAGEEIPGFVSRGGIPDGPKHG--AFARWQKWIS-----EGYSSVAH 585  
A0A177UVE5 LQGDAFKNISSGPNKPGFKVVP---DDSVNHG--SYATWQAWIS-----KNEGSAVVAH 571

ODH LGSPPLSSLL-VGETVPGFKTV----PNNNGG--TDADWKKWIL--KPGNSAGFAVVAH 528  
A0A1B9I658 FQTSPLRSIV-TEENAPGYNEV----PENNDGG--SDEDWSNWIL-----NGFSSVHH 539  
PBK65148 LSSPPLSDLS-TGEVIPGD-SV----PDNGERG--TEEDWTSWIT-----NGFAAVSH 543  
A0A067ST11 LTTPLSSLS-TGETRPGS-AV----PDNASRG--TDAAWKSWIK-----STFDSVAH 546

A0A0L1HZM0 FATSPLADH-ITGELSPGFETV-----PQDAGWRDASWDAWIK-----QTIIGNSH 533  
A0A1L9P605 WGTDPVRSR-AGQRLQPAVGDL-----PSNA--TDEALDKWIA-----SSFSANQH 522  
A0A1W2TMR5 WNTEPVSDI-VGARVSPTDDD-----PLNA--TDEQWAGYIS-----DSITPNHH 533  
A0A024S2J7 WTTAPISAV-IEARVDPNSTIL-----PDNA--TDAQWEDFTR-----SSILSNSH 528

GDH\_A2QM15 FQSAPLANI-IAEETNPGFEAV-----AANG--SEEDWKAWLL-----TOYRSNFH 530  
GDH\_4YNU\_B8MX95 LRSAPLNKL-IAKETKPLSEI-----PATA--ADEKWVEWLK-----ANYRSNFH 527  
GDH\_G8E4B4 FGTGPFASV-AGTETTPGFDVI-----PADA--DEATWKSAT-----KEYRSNFH 537  
GDH\_G3YD20 LGTAPLNSL-VGEEVSPGLDVL-----PASA--SSATWTKWVK-----ENYRTNYH 525

. . \* : \*

|                        |                                                                     |            |
|------------------------|---------------------------------------------------------------------|------------|
| <b>GOX_A0A1V6T4B5</b>  | AVSTCSMMSRELGGVVDATAKVVYGTQGLRVIDGSIPPTQVSSHVMTVIFYGMALRIAESVL      | 597        |
| <b>GOX_1CF3_P13006</b> | GVGTCSMMPKEMGGVVDNAARVYGVQGLRVIDGSIPPTQMSSHVMTVIFYAMALKISDAIL       | 598        |
| <b>GOX_1GPE_Q9URJ8</b> | AVSSCSMMSRELGGVVDATAKVVYGTQGLRVIDGSIPPTQVSSHVMTIFYGMALKVADAIL       | 598        |
| <b>GOX_Q92452</b>      | AVSSCSMMSRELGGVVDATAKVVYGTQGLRVIDGSIPPTQVSSHVMTIFYGMALKVADAIL       | 598        |
| A0A139IH18             | GVGTAAMLPRKWGGVVNGDLKVVYGTSNVRVVDASAVPFNMGGHPSTMYALAERAHLIL         | 585        |
| M2ZEM9                 | GIGTAAMLPRKWGGVVDGNLKVYGTSNVRVVDASAVPFNMGGHPSTMYALAERAHLIL          | 585        |
| K2RH81                 | PVGTTSMPLRQNGGVVDAELKVYGTANVRIVDAGVFPFQINGHPSATVYAVAERAADIIK        | 588        |
| R1EB07                 | PVGTTSMPLPRAAGGVVDPQLRVYGTANVRVVDAGVMPFQVNGHPSATVYAVAERAADMIK       | 592        |
| A0A139HTB9             | YVATCAMPKEEFGGVVDSKLVYGIENVRVVDASVLPQLSAHLSSSLYGIAEKAQOMVR          | 620        |
| A0A1Z5TBL7             | YIATLAMPKEEYGGVVDNRLKIYGIENVRAIDASVLPQLSAHLSSSLYGIAEKAAMIK          | 625        |
| A0A074W657             | PIATLSMMKEEFGGVVDNKLKVYGLSNVRVVDASVLPVQLSAHLSSSLYGIAEKAVMIR         | 602        |
| A0A1Y2DT19             | PVATLSRMAEQDGGVVDESFRVYGVQNVVRVVDASVLPVQLSAHLSSSLYGIALKAAGIIR       | 610        |
| A0A0D1DW37             | QLGTAAMGSRSLGAVVDAKFKVYGTSNVRVVDASVLPVQISAHLSSTLYGVAEKAADTIL        | 632        |
| A0A081CFT4             | QLGTAAMGSKQNGGVVDGNFKVYGTNVRVVDASVVPVQLSAHLSASLYGVAEKAADAIL         | 623        |
| A0A177U6A2             | PVGTCALLPRQMGVVVDASFKVYGTANVRVVDASTLPQLISAHLSSTLYGIAERAADQIS        | 645        |
| A0A177UVE5             | PIATCSLAPRAMGGVVDPNFLVYGTNVRVVDASTLPMQISAHLSSTLYGIAERAADSIIK        | 631        |
| <b>ODH</b>             | <b>PIGTAAMKRSLLGGVVDAQLKVYDTTNLRVVDASMMPLQISAHLSSTLYGVAEKAADLIK</b> | <b>588</b> |
| A0A1B9I658             | PIATCSMMSEELGGVVGSDLKVYNTENLRIVDASVLP IQFSAHLSATLYGLAENAADM--       | 597        |
| PBK65148               | PIGTLAMMKRSLGGVVDSQLKVYDTSNVRVVDASIVPIHISAHLSAGLYGVAEKAADLIK        | 603        |
| A0A067ST11             | PIGTAAMKRSLLGGVVDSQLKVYGTNVRVVDASIMPLQISAHLSSTLYGVAEKAADLIK         | 606        |
| A0A0L1HZM0             | PLSTCAMPQKDLGGVVDTEGKVYGTQNVVRVVDASIFPTQISGHLASVYAVAGRIAAVMM        | 593        |
| A0A1L9P605             | LVGTASMLPMEFGGVVDTNLVVYGTENVRVVDASVLPQNSGHLTSLIYAVAERAADIIK         | 582        |
| A0A1W2TMR5             | PLGTASMMSRELGGVVDAELKVYGTGNVRVVDASVLP IQFSGHLTATLYAVAERAEEIIA       | 593        |
| A0A024S2J7             | SLGTAAMMKREWGGVVDSQMRVYGTGNVRVVDASVLPMQVSGHLTATLYAVAERAGEMIV        | 588        |
| <b>GDH_A2QM15</b>      | PVGTAAMMPQDKGGVVDNRLTVYGTSNVRVVDASVLPFQVCGHLVSTLYAVAERASDLIK        | 590        |
| <b>GDH_4YNU_B8MX95</b> | PVGTAAMMPRSIGGVVDNRLRVYGTSNVRVVDASVLPFQVCGHLVSTLYAVAERASDLIK        | 587        |
| <b>GDH_G8E4B4</b>      | PVATAAMLPEKEKGGVVDAQLKVYGTNVRVVDASVLPFQVCGHLVSTLYAVAERASDLIK        | 597        |
| <b>GDH_G3YD20</b>      | PVGTTSMPLPREKGGVVSPELKVYGTKNVRVVDASVLPFQLCGHLTSTLYAVAERASDLIK       | 585        |
|                        | :.: : *.*.* :* .:* *.. * .* :.*.* . .                               |            |
| <b>GOX_A0A1V6T4B5</b>  | EDYAKKA-----                                                        | 604        |
| <b>GOX_1CF3_P13006</b> | EDYASMQ-----                                                        | 605        |
| <b>GOX_1GPE_Q9URJ8</b> | DDYAKSA-----                                                        | 605        |
| <b>GOX_Q92452</b>      | DDYAKSA-----                                                        | 605        |
| A0A139IH18             | TGEKG-----                                                          | 590        |
| M2ZEM9                 | TGEKG-----                                                          | 590        |
| K2RH81                 | QSFSAEIEIFNWHLTISTQNHQPLKVKPPVDISKPRNEELFSQTCLAT                    | 636        |
| R1EB07                 | ESFAGGGVVGASGGTEGSG-TGTPGA-AARMGRVKGRVVRL-----                      | 630        |
| A0A139HTB9             | LDWGGE-----                                                         | 626        |
| A0A1Z5TBL7             | EDQKGFREQPWAHQH-----                                                | 640        |
| A0A074W657             | EDQI-----                                                           | 606        |
| A0A1Y2DT19             | EDQ-----                                                            | 613        |
| A0A0D1DW37             | AR-----                                                             | 634        |
| A0A081CFT4             | AK-----                                                             | 625        |
| A0A177U6A2             | ASQ-----                                                            | 648        |
| A0A177UVE5             | AAQT-----                                                           | 635        |
| <b>ODH</b>             | <b>AAQ-----</b>                                                     | <b>591</b> |
| A0A1B9I658             | -----                                                               | 597        |
| PBK65148               | ASY-----                                                            | 606        |
| A0A067ST11             | ASY-----                                                            | 609        |
| A0A0L1HZM0             | KAVTMK-----                                                         | 599        |
| A0A1L9P605             | ETL-----                                                            | 585        |
| A0A1W2TMR5             | GAV-----                                                            | 596        |
| A0A024S2J7             | GDRSGL-----                                                         | 594        |
| <b>GDH_A2QM15</b>      | ADSALF-----                                                         | 596        |
| <b>GDH_4YNU_B8MX95</b> | EDAKSA-----                                                         | 593        |
| <b>GDH_G8E4B4</b>      | AAA-----                                                            | 600        |
| <b>GDH_G3YD20</b>      | ESY-----                                                            | 588        |

**Figure S7.** Close-up view of the active site flavin. Protein and FAD carbon atoms are shown in wheat and yellow respectively, O atoms in red, N atoms in blue. **a** Interactions between the isoalloxazine ring and the protein. The isoalloxazine ring is rigidly fixed through a dense network of hydrogen bonds. Most contacts involve the protein backbone except for Ser573, which stabilizes the cofactor also with its side chain. Ser573 is modelled in double conformation: one conformer interacts with the flavin system, the other interacts with Asn97 side chain. Asn97 is located on the *si*-face of the isoalloxazine ring, while the two catalytic histidines, His528 and His571, lie on the *re*-face: the orientation of their imidazole ring is due to hydrogen bonding with Gln329 and Glu414 respectively. **b** Residues facing the active site. Except for Gln331, most of the residues directly facing the active site possess aromatic side chains: Tyr64, Phe416 and Trp430. Water molecules are depicted as red spheres. Hydrogen bonds (distance < 3.2 Å) are represented with a dotted line.

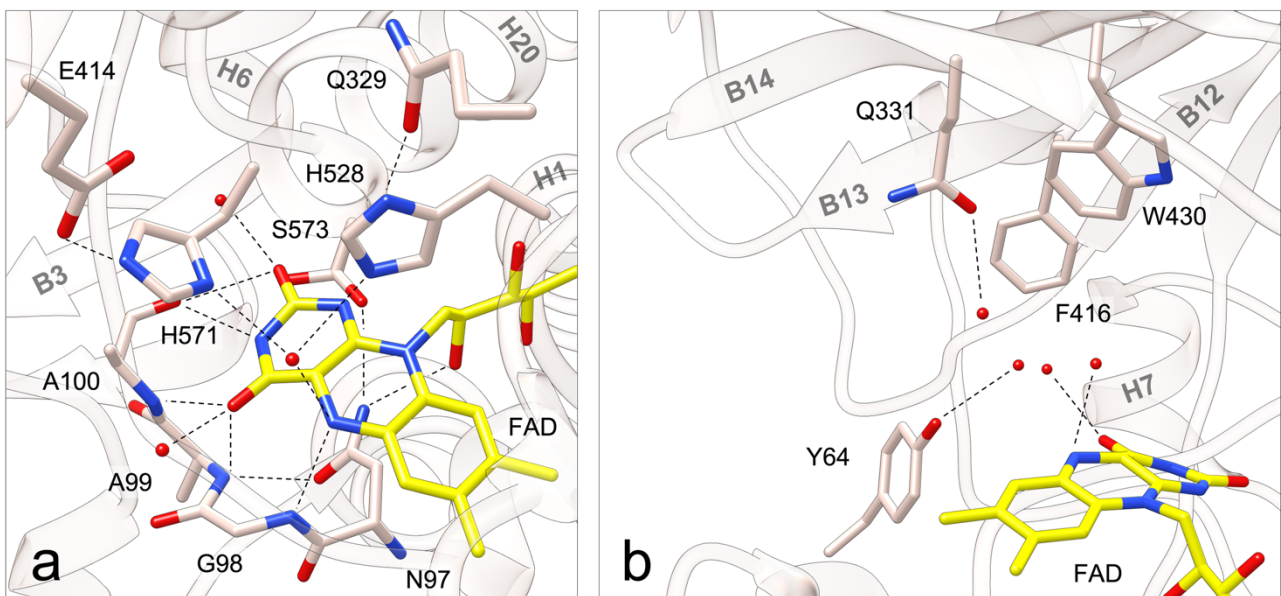

**Figure S8.** Details of the two anomeric forms of glucose (GLC) and laminaribiose (G3G) bound to ODH active site, **a** Top view (perpendicular to the isoalloxazine plane) and **b** side view of  $\beta$ -G3G in ODH-G3G; **c** top view and **d** side view of  $\alpha$ -G3G in ODH-G3G; the protein is shown in green, the FAD cofactor in yellow, G3G in pink ( $\beta$  anomer) or magenta ( $\alpha$  anomer). **e** Top view and **f** side view of  $\beta$ -GLC in ODH-GLC; **g** top view and **h** side view of  $\beta$ -GLC in ODH-GLC; the protein is shown in light blue, the FAD cofactor in yellow, GLC in orange ( $\beta$  anomer) or gold ( $\alpha$  anomer); O atoms are in red, N atoms in blue. Water molecules are depicted as red spheres. Hydrogen bonds (distance  $< 3.2$  Å) are represented with dotted lines.

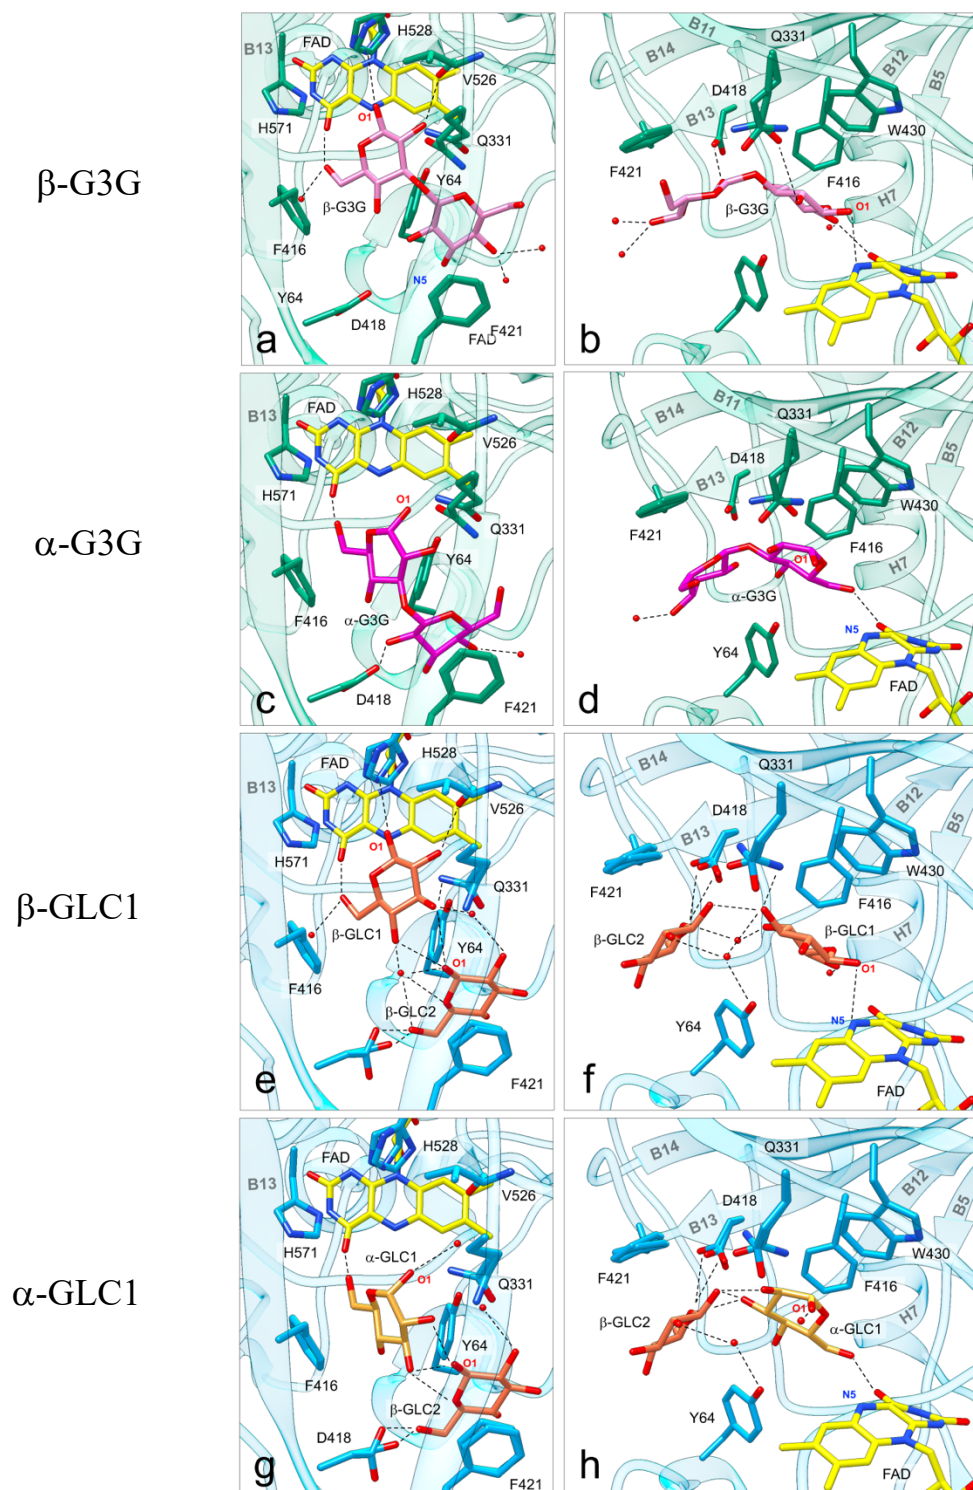

**Figure S9.** PDBe Motif analysis of protein-ligand interactions in ODH-G3G, ODH-GLC and *Af*GDH-LGC. Comparison of the simplified PDBe outputs for: i) (upper panel)  $\beta$ - and  $\alpha$ -LMB reducing end pyranose in ODH-G3G (pdb: 6XUV) and gluconoactone (LGC) in *Af*GDH-LGC (4YNU); ii) (lower panel)  $\beta$ - and  $\alpha$ -LMB non-reducing end pyranose in ODH-G3G (pdb: 6XUV) and GLC2 in ODH-GLC (pdb: 6XUU). As for the reducing end of  $\beta$ - and  $\alpha$ -G3G, similar results were obtained for  $\alpha$ - and  $\beta$ -GLC1 in ODH-GLC (not shown). Colors represent different bond types. Atom pairs, distances and eventually angles are reported. No van-der-waals interactions have been shown, apart from two crucial ones between Tyr53 hydroxyl and LGC in *Af*GDH-LGC (for more details see Additional file 2, Section 4).

Ligand bond colours: Phylogenetically relevant H bonds (side chains) H bonds (others) electrostatic van-der-waals atom-plane plane-plane

- ligand-protein interactions for  $\beta$ LMB reducing end (ODH-LMB, 6XUV):

| Atom | Bond         | Neighbour                                         |
|------|--------------|---------------------------------------------------|
| O1   | 3.04Å        | NE2. <a href="#">HIS</a> 528A                     |
|      | 2.98Å        | N5. <a href="#">FAD</a> 601A                      |
| O2   | 2.80Å        | O. <a href="#">VAL</a> 526A                       |
|      | 3.14Å        | OE1. <a href="#">GLN</a> 331A                     |
| O3   | 2.99Å        | OE1. <a href="#">GLN</a> 331A                     |
| O6   | 2.78Å        | O4. <a href="#">FAD</a> 601A                      |
| C3   | 3.38Å        | OH. <a href="#">TYR</a> 64A                       |
| C6   | 3.35Å/22918° | CD1,CD2,CE1,CE2,CG,CZ. <a href="#">PHE</a> 416A   |
|      | 4.25Å/27°    | CD2,CE2,CE3,CH2,CZ2,CZ3. <a href="#">TRP</a> 430A |

- ligand-protein interactions for  $\alpha$ LMB reducing end (ODH-LMB, 6XUV):

| Atom | Bond         | Neighbour                                       |
|------|--------------|-------------------------------------------------|
| O6   | 2.48Å        | O4. <a href="#">FAD</a> 601A                    |
| C4   | 3.44Å/22918° | CD1,CD2,CE1,CE2,CG,CZ. <a href="#">PHE</a> 416A |
|      | 4.32Å/30°    | CD1,CD2,CE1,CE2,CG,CZ. <a href="#">PHE</a> 416A |

- ligand-protein interactions for gluconoactone (LGC) (*Af*GDH-LGC, 4YNU):

| Atom              | Bond      | Neighbour                                                                              |
|-------------------|-----------|----------------------------------------------------------------------------------------|
| O1                | 2.79Å     | NE2. <a href="#">HIS</a> 505A                                                          |
|                   | 2.57Å     | ND1. <a href="#">HIS</a> 548A                                                          |
|                   | 3.07Å     | N5. <a href="#">FAD</a> 601A                                                           |
| O2                | 2.66Å     | O. <a href="#">ASN</a> 503A                                                            |
| O3                | 2.78Å     | OD1. <a href="#">ASN</a> 503A                                                          |
|                   | 2.83Å     | NH1. <a href="#">ARG</a> 501A                                                          |
| O4                | 2.60Å     | OE1. <a href="#">GLU</a> 413A                                                          |
|                   | 2.89Å     | NH2. <a href="#">ARG</a> 501A                                                          |
| C3                | 2.71Å     | OH. <a href="#">TYR</a> 53A                                                            |
|                   | 3.46Å     | OH. <a href="#">TYR</a> 53A                                                            |
| C1,C2,C3,C4,C5,O5 | 4.05Å/37° | CD2,CE2,CE3,C H2,CZ2,CZ3. <a href="#">TRP</a> 415A                                     |
|                   | 3.98Å/16° | C10,C2,C4,C4X,C5X,C6,C7,C7M,C8,C8M,C9,C9A,N1,N10,N3,N5,O2,O4. <a href="#">FAD</a> 601A |

- ligand-protein interactions for  $\beta$ LMB non-reducing end (ODH-LMB, 6XUV):

| Atom              | Bond     | Neighbour                                       |
|-------------------|----------|-------------------------------------------------|
| C1,C2,C3,C4,C5,O5 | 4.09Å/1° | CD1,CD2,CE1,CE2,CG,CZ. <a href="#">PHE</a> 421A |

- ligand-protein interactions for  $\alpha$ LMB non-reducing end (ODH-LMB, 6XUV):

| Atom              | Bond      | Neighbour                                       |
|-------------------|-----------|-------------------------------------------------|
| O2                | 3.10Å     | OD2. <a href="#">ASP</a> 418A                   |
| C1,C2,C3,C4,C5,O5 | 4.02Å/23° | CD1,CD2,CE1,CE2,CG,CZ. <a href="#">PHE</a> 421A |

- ligand-protein interactions for GLC2 (ODH-GLC, 6XUU):

| Atom              | Bond      | Neighbour                                       |
|-------------------|-----------|-------------------------------------------------|
| O6                | 3.10Å     | OD2. <a href="#">ASP</a> 418A                   |
| C1,C2,C3,C4,C5,O5 | 4.28Å/26° | CD1,CD2,CE1,CE2,CG,CZ. <a href="#">PHE</a> 421A |

**Figure S10.** Surface representation of ODH substrate-binding cavity in ODH-GLC (6XUU). Four GLC molecules bind to this region, numbered according to their proximity to the active site FAD. They seem to be caught in the diffusion process from the bulk to the flavin system, with GLC4 and 3 binding to the funnel-shaped opening to the solvent of ODH active site, while GLC2 and 1 bind close to the FAD cofactor within a V-shaped tunnel. ODH surface is shown in light blue, GLC molecules in orange (C atoms) and red (O atoms) sticks.

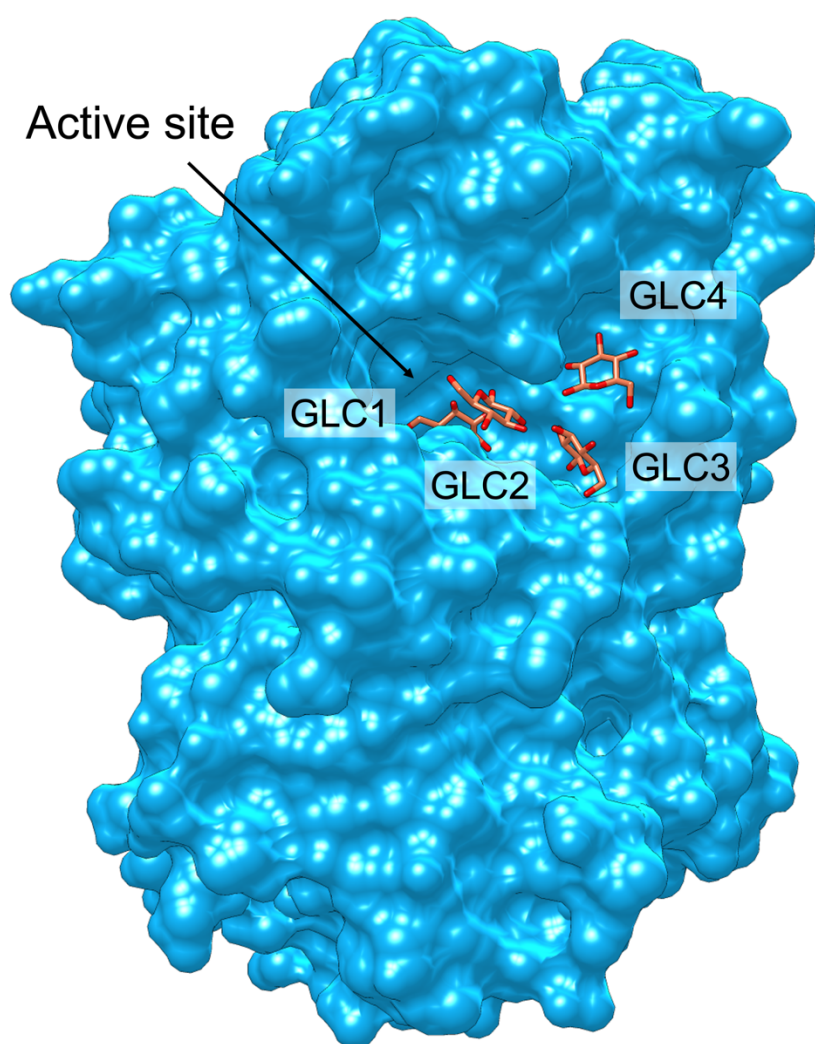



**Figure S11.** External sugar-binding sites (SBSs) in ODH-GLC (6XUU). All three sites are located on the convex face of ODH, whose surface is represented in the center and colored in light blue. SBSs are numbered according to their proximity to the active site entrance, located on the concave face of the protein (not visible). The three insets show the detail of ODH-ligand interactions. GLC molecules and the surrounding protein atoms are represented as orange and light blue sticks respectively (C atoms); O atoms are in red, N atoms in blue and water molecules are depicted as red spheres. Hydrogen bonds (distance  $< 3.2 \text{ \AA}$ ) are represented with dotted lines. The  $2F_o - F_c$  electron density map is also depicted for the GLC molecules and contoured at  $1\sigma$ .

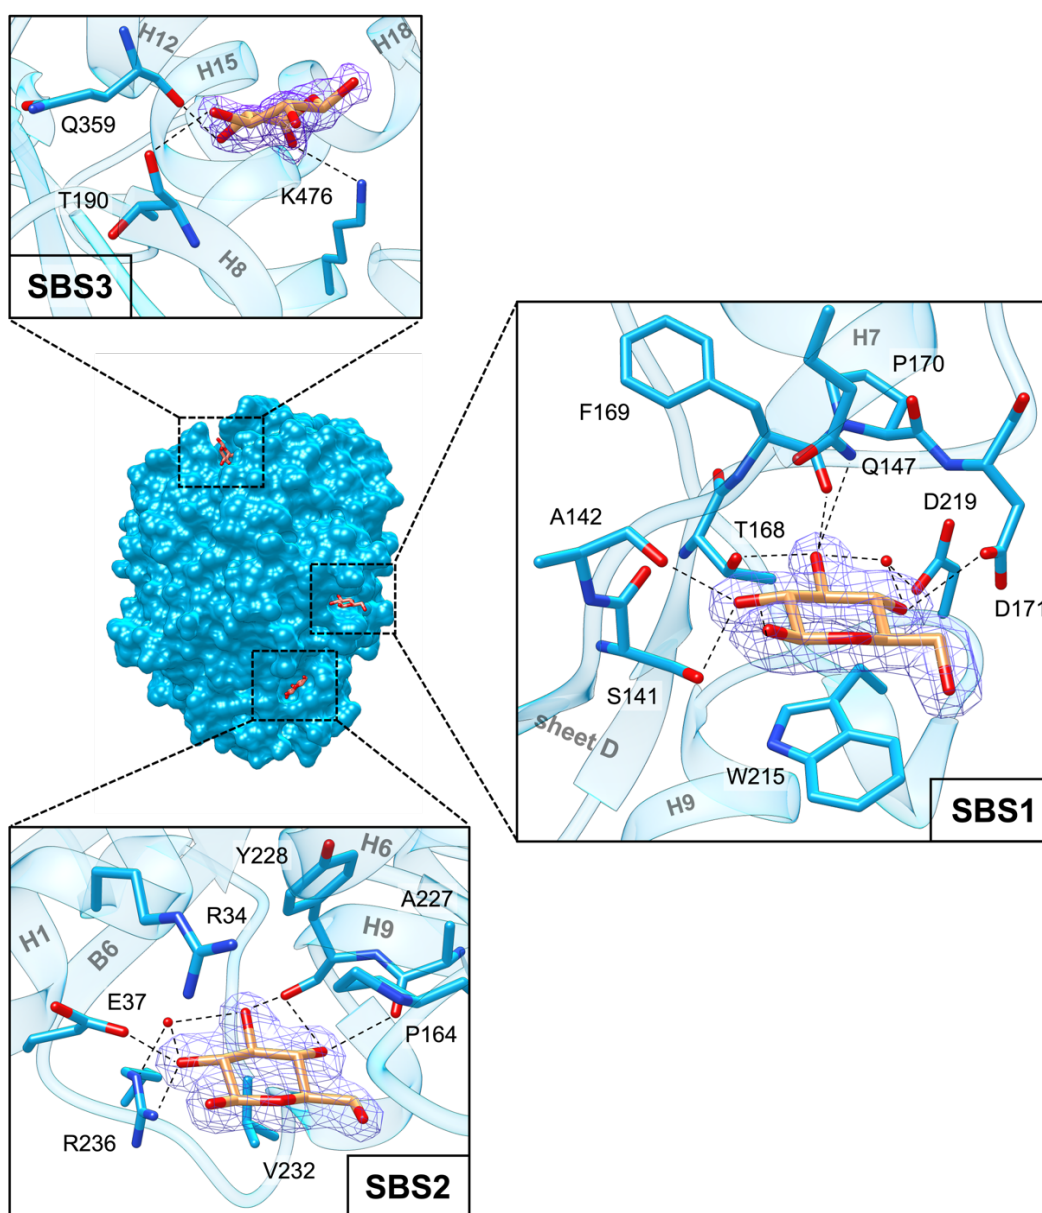

Supplement: 13068_2021_2003_MOESM1_ESM.pdf [file 13068_2021_2003_MOESM1_ESM.pdf]
